# Supplementary material for: Identification and Characterization of α-Glucosidase Inhibition Flavonol Glycosides from Jack Bean (Canavalia ensiformis (L.) DC
Source: MDPI journal article supplement (doi:10.3390/molecules25112481), 2020-05-27
Supplement: s1 [file s1]

## SUPPLEMENT INFORMATION

# Identification and characterization of $\alpha$ -glucosidase inhibition flavonol glycosides from jack bean (*Canavalia ensiformis* (L.) DC.

Anita M. Sutedja<sup>1,2,3</sup>, Emiko Yanase<sup>1,\*</sup>, Irmanida Batubara<sup>4,5</sup>, Dedi Fardiaz<sup>2</sup> and Hanifah N. Lioe<sup>2</sup>

<sup>1</sup> Faculty of Applied Biological Sciences, Graduate School of Applied Biological Sciences, Gifu University, 1-1 Yanagido, Gifu City, Gifu 501-1193, Japan; [e-yanase@gifu-u.ac.jp](mailto:e-yanase@gifu-u.ac.jp)

<sup>2</sup> Department of Food Science and Technology, Faculty of Agricultural Engineering and Technology, IPB University, Kampus IPB Dramaga, Bogor 16680, West Java, Indonesia; [hanifahlio@apps.ipb.ac.id](mailto:hanifahlio@apps.ipb.ac.id); [dedi\\_fardiaz@yahoo.com.sg](mailto:dedi_fardiaz@yahoo.com.sg)

<sup>3</sup> Department of Food Technology, Faculty of Agricultural Technology, Widya Mandala Catholic University Surabaya, Jalan Dinoyo 42-44, Surabaya 60265, East Java, Indonesia; [maya@ukwms.ac.id](mailto:maya@ukwms.ac.id)

<sup>4</sup> Department of Chemistry, Faculty of Mathematics and Natural Science, IPB University, Kampus IPB Dramaga, Bogor 16680, West Java, Indonesia; [imebatubara@gmail.com](mailto:imebatubara@gmail.com)

<sup>5</sup> Tropical Biopharmaca Research Center IPB University, Kampus IPB Taman Kencana No 3, Bogor 16128, West Java, Indonesia

\* Correspondence: [e-yanase@gifu-u.ac.jp](mailto:e-yanase@gifu-u.ac.jp); Tel.: +81-58 293 2914

## Table of Content

|                                                                                                                          |    |
|--------------------------------------------------------------------------------------------------------------------------|----|
| Figure S1. <sup>1</sup> H NMR spectrum of compound <b>1</b> (CD <sub>3</sub> OD, 800 MHz)                                | 4  |
| Figure S2. <sup>13</sup> C NMR spectrum of compound <b>1</b> (CD <sub>3</sub> OD, 800 MHz)                               | 5  |
| Figure S3. <sup>1</sup> H- <sup>1</sup> H COSY of compound <b>1</b> (CD <sub>3</sub> OD, 800 MHz)                        | 6  |
| Figure S4. HMQC of compound <b>1</b> (CD <sub>3</sub> OD, 800 MHz)                                                       | 7  |
| Figure S5. HMBC of compound <b>1</b> (CD <sub>3</sub> OD, 800 MHz)                                                       | 8  |
| Figure S6. <sup>1</sup> H NMR spectrum of compound <b>2</b> (CD <sub>3</sub> OD, 800 MHz)                                | 9  |
| Figure S7. <sup>13</sup> C NMR spectrum of compound <b>2</b> (CD <sub>3</sub> OD, 800 MHz)                               | 10 |
| Figure S8. <sup>1</sup> H- <sup>1</sup> H COSY of compound <b>2</b> (CD <sub>3</sub> OD, 800 MHz)                        | 11 |
| Figure S9. HMQC of compound <b>2</b> (CD <sub>3</sub> OD, 800 MHz)                                                       | 12 |
| Figure S10. HMBC of compound <b>2</b> (CD <sub>3</sub> OD, 800 MHz)                                                      | 13 |
| Figure S11. <sup>1</sup> H NMR spectrum of compound <b>3</b> (CD <sub>3</sub> OD, 800 MHz)                               | 14 |
| Figure S12. <sup>13</sup> C NMR spectrum of compound <b>3</b> (CD <sub>3</sub> OD, 800 MHz)                              | 15 |
| Figure S13. <sup>1</sup> H- <sup>1</sup> H COSY of compound <b>3</b> (CD <sub>3</sub> OD, 800 MHz)                       | 16 |
| Figure S14. HMQC of compound <b>3</b> (CD <sub>3</sub> OD, 800 MHz)                                                      | 17 |
| Figure S15. HMBC of compound <b>3</b> (CD <sub>3</sub> OD, 800 MHz)                                                      | 18 |
| Figure S16. <sup>1</sup> H NMR spectrum of compound <b>4</b> (CD <sub>3</sub> OD, 600 MHz)                               | 19 |
| Figure S17. <sup>13</sup> C NMR spectrum of compound <b>4</b> (CD <sub>3</sub> OD, 600 MHz)                              | 20 |
| Figure S18. <sup>1</sup> H- <sup>1</sup> H COSY of compound <b>4</b> (CD <sub>3</sub> OD, 600 MHz)                       | 21 |
| Figure S19. HMQC of compound <b>4</b> (CD <sub>3</sub> OD, 600 MHz)                                                      | 22 |
| Figure S20. HMBC of compound <b>4</b> (CD <sub>3</sub> OD, 600 MHz)                                                      | 23 |
| Figure S21. LC/ESI/MS/MS data of compound <b>1</b>                                                                       | 24 |
| Figure S22. LC/ESI/MS/MS data of compound <b>2</b>                                                                       | 25 |
| Figure S23. LC/ESI/MS/MS data of compound <b>3</b>                                                                       | 26 |
| Figure S24. LC/ESI/MS/MS data of compound <b>4</b>                                                                       | 27 |
| Figure S25. LC/ESI/MS/MS data of compound <b>5</b>                                                                       | 28 |
| Figure S26. LC/ESI/MS/MS data of compound <b>6</b>                                                                       | 29 |
| Figure S27. LC/ESI/MS/MS data of compound <b>7</b>                                                                       | 30 |
| Figure S28. LC/ESI/MS/MS data of compound <b>8</b>                                                                       | 31 |
| Figure S29. LC/ESI/MS/MS data of compound <b>9</b>                                                                       | 32 |
| Figure S30. LC/ESI/MS/MS data of compound <b>10</b>                                                                      | 33 |
| Figure S31. LC/ESI/MS/MS data of compound <b>11</b>                                                                      | 34 |
| Figure S32. LC/ESI/MS/MS data of compound <b>12</b>                                                                      | 35 |
| Figure S33. LC/ESI/MS/MS data of compound <b>13</b>                                                                      | 36 |
| Figure S34. LC/ESI/MS/MS data of compound <b>14</b>                                                                      | 37 |
| Figure S35. GC-MS total ion chromatogram and extracted ion chromatogram of trimethylsilyl (TMS) derivatives of galactose | 38 |

|                                                                                                                               |    |
|-------------------------------------------------------------------------------------------------------------------------------|----|
| Figure S36. GC-MS total ion chromatogram and extracted ion chromatogram of trimethylsilyl (TMS) derivatives of glucose        | 39 |
| Figure S37. GC-MS total ion chromatogram and extracted ion chromatogram of trimethylsilyl (TMS) derivatives of rhamnose       | 40 |
| Figure S38. GC-MS total ion chromatogram and extracted ion chromatogram trimethylsilyl (TMS) derivatives of compound <b>1</b> | 41 |
| Figure S39. GC-MS total ion chromatogram and extracted ion chromatogram trimethylsilyl (TMS) derivatives of compound <b>2</b> | 42 |
| Figure S40. GC-MS total ion chromatogram and extracted ion chromatogram trimethylsilyl (TMS) derivatives of compound <b>3</b> | 43 |
| Figure S41. GC-MS total ion chromatogram and extracted ion chromatogram trimethylsilyl (TMS) derivatives of compound <b>4</b> | 44 |
| Figure S42. Chromatogram of compounds <b>1</b> (a) and <b>2</b> (b)                                                           | 45 |
| Figure S43. Chromatogram of compounds <b>3</b> (a) and <b>4</b> (b)                                                           | 46 |

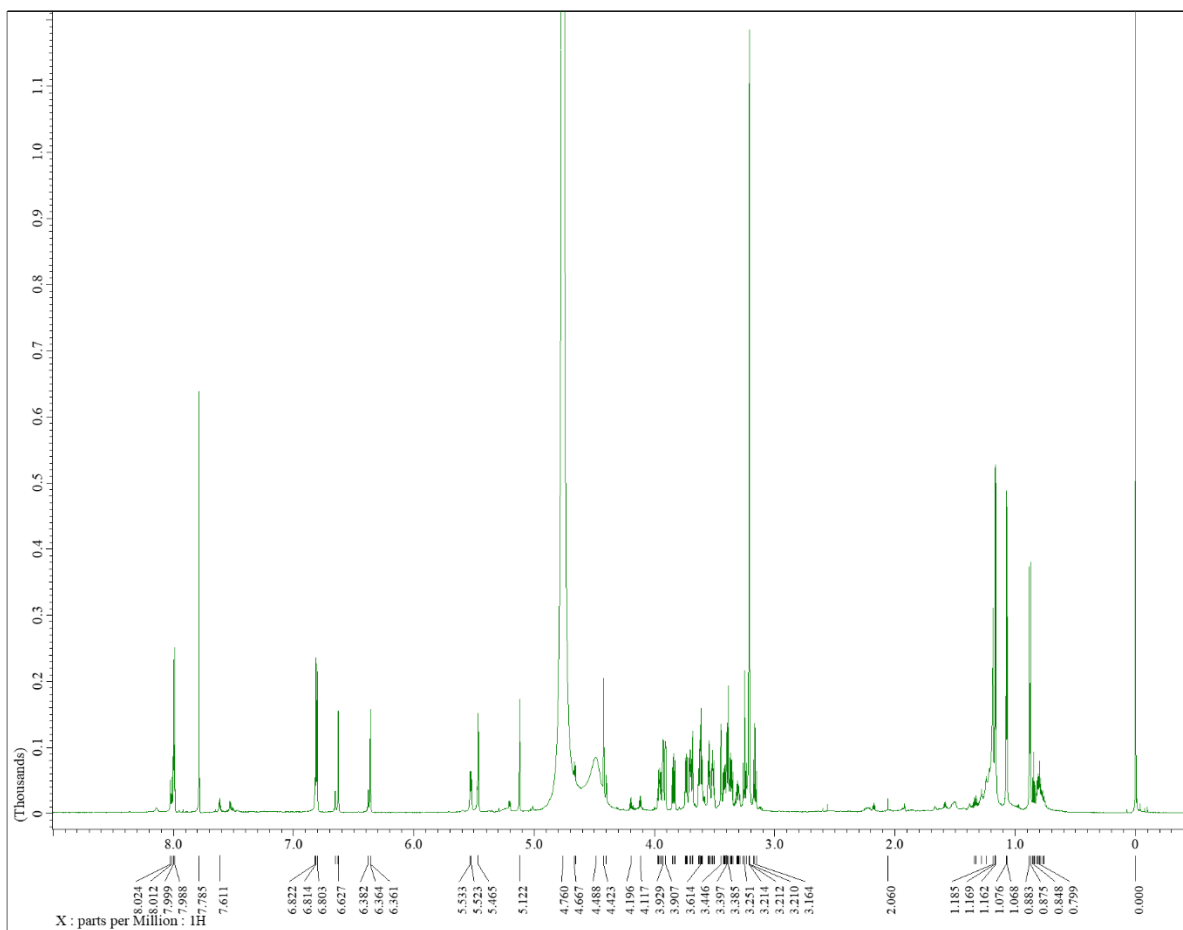

Figure S1. <sup>1</sup>H NMR spectrum of compound 1 (CD<sub>3</sub>OD, 800 MHz)

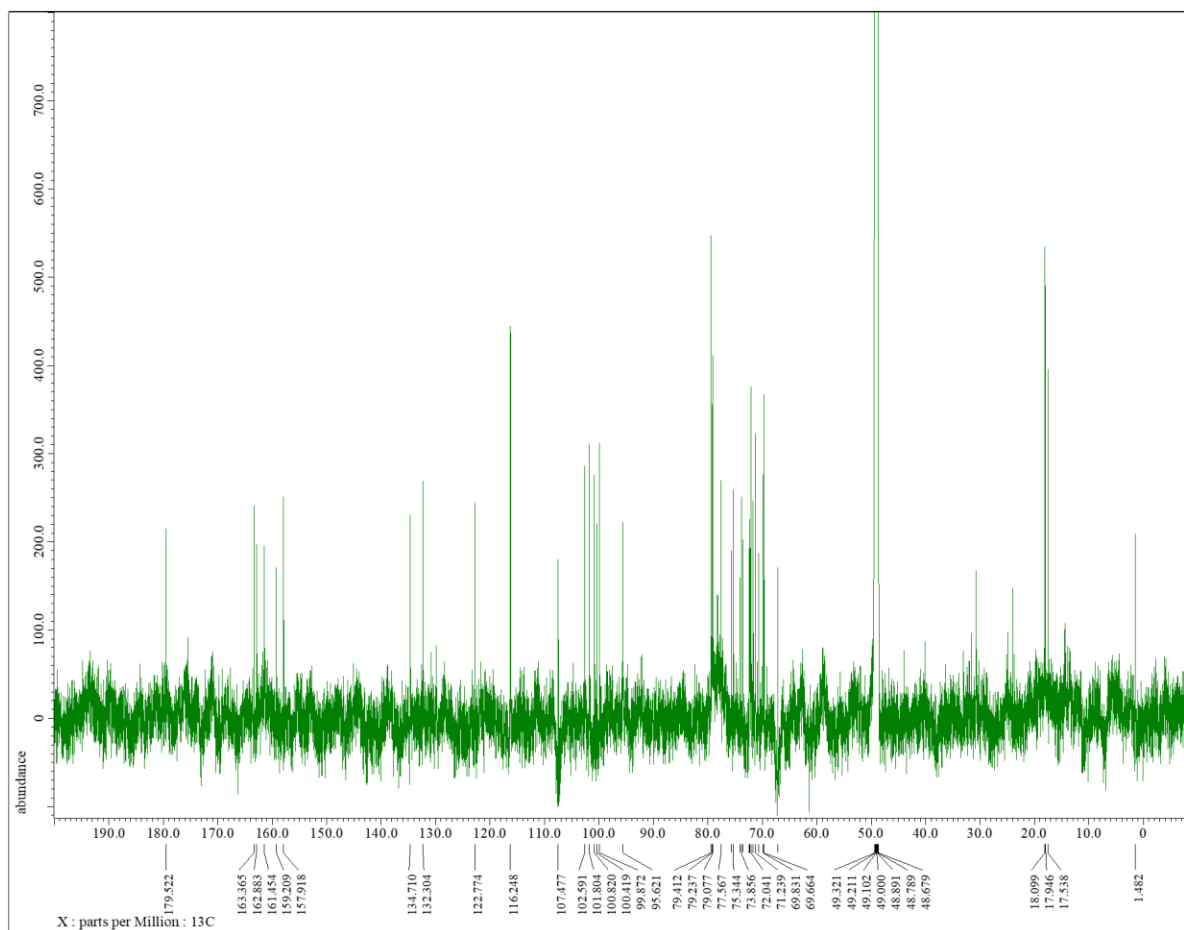

**Figure S2.**  $^{13}\text{C}$  NMR spectrum of compound 1 ( $\text{CD}_3\text{OD}$ , 800 MHz)

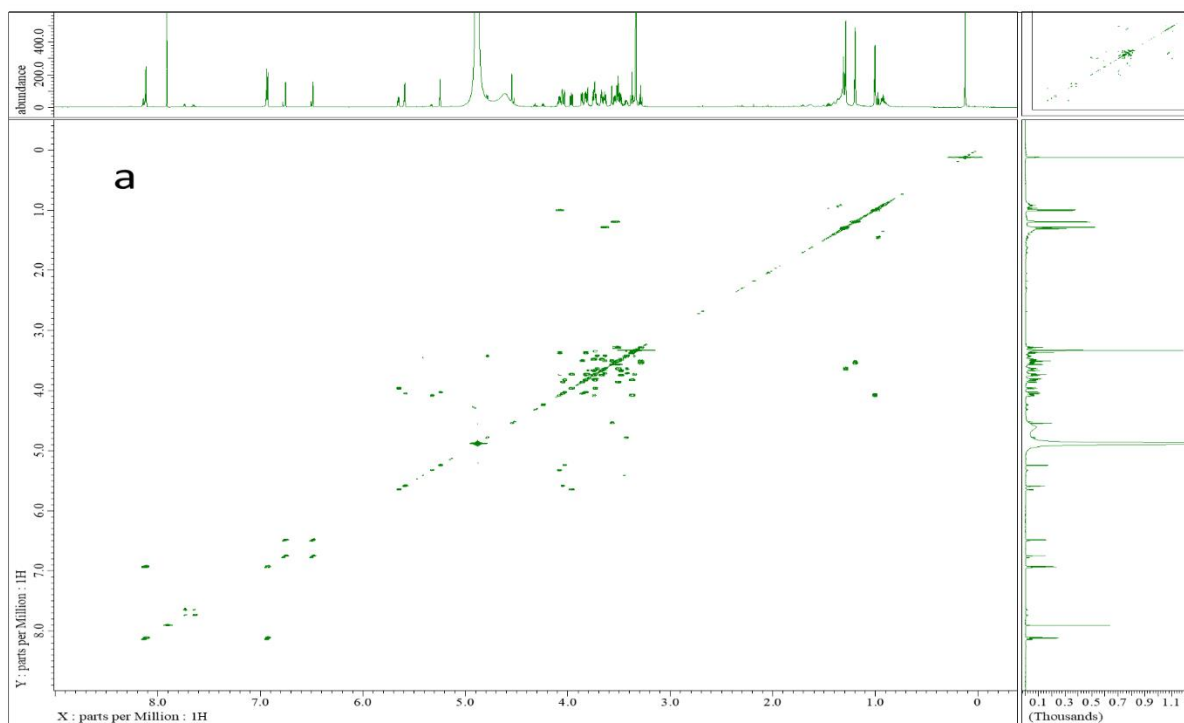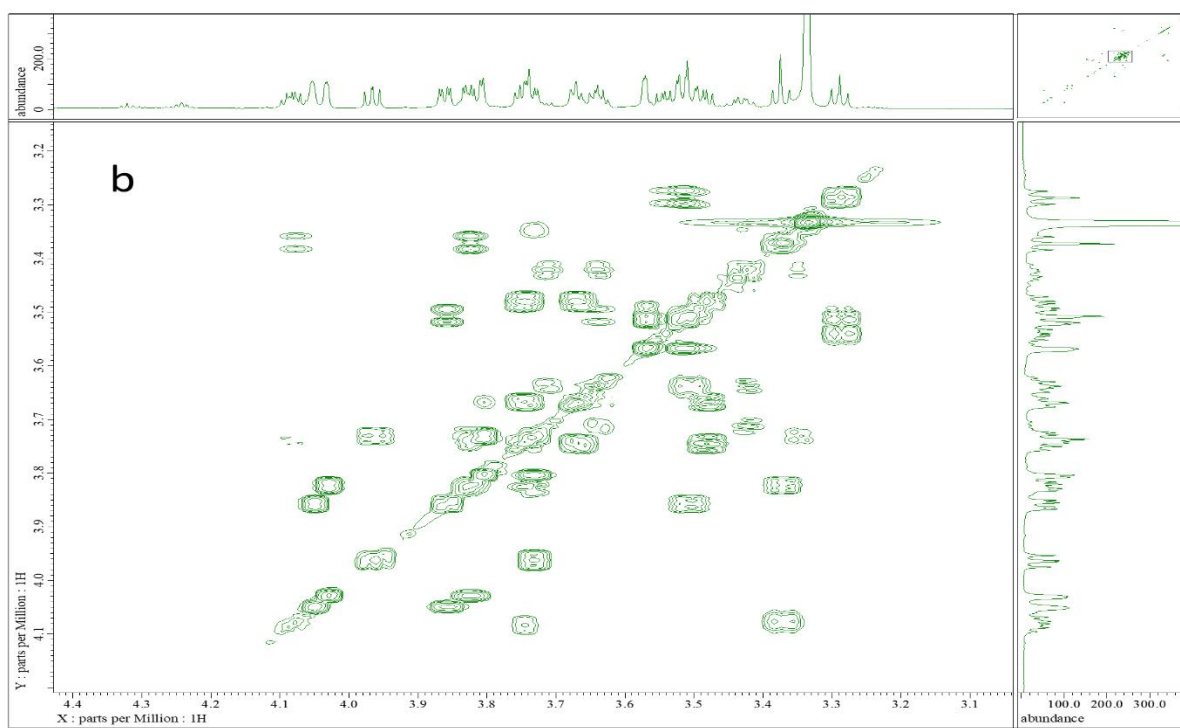

**Figure S3.**  $^1\text{H}$ - $^1\text{H}$  COSY of compound **1** ( $\text{CD}_3\text{OD}$ , 800 MHz)

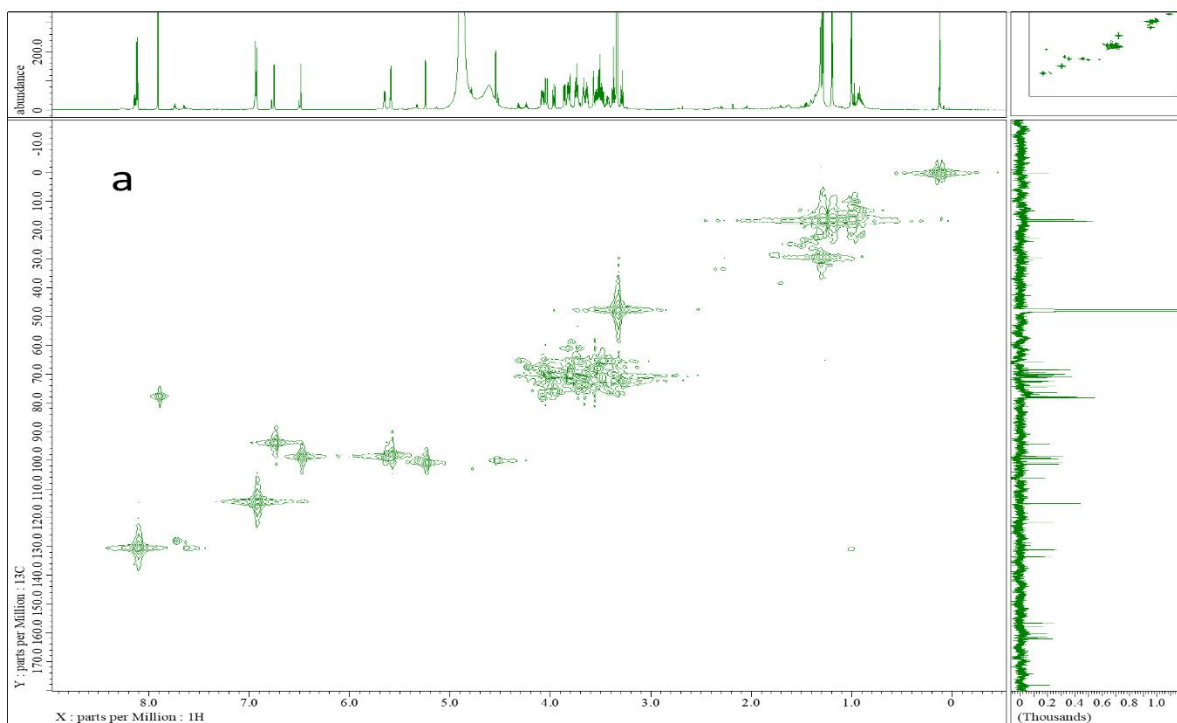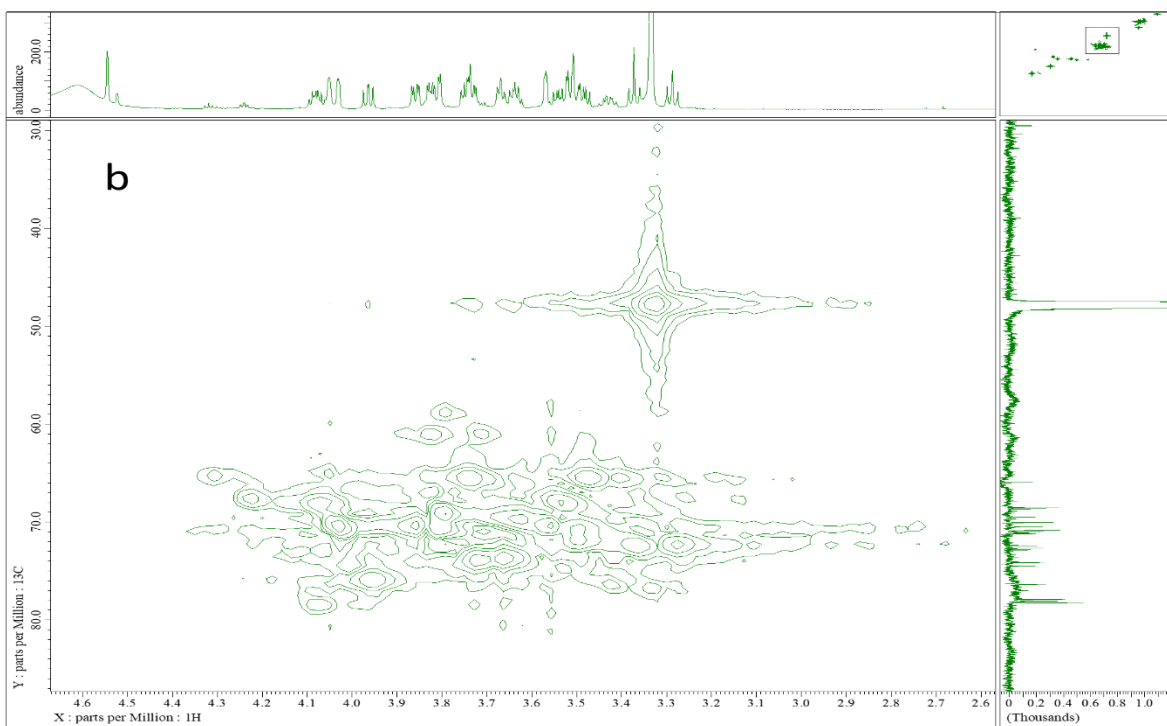

Figure S4. HMQC of compound 1 (CD<sub>3</sub>OD, 800 MHz)

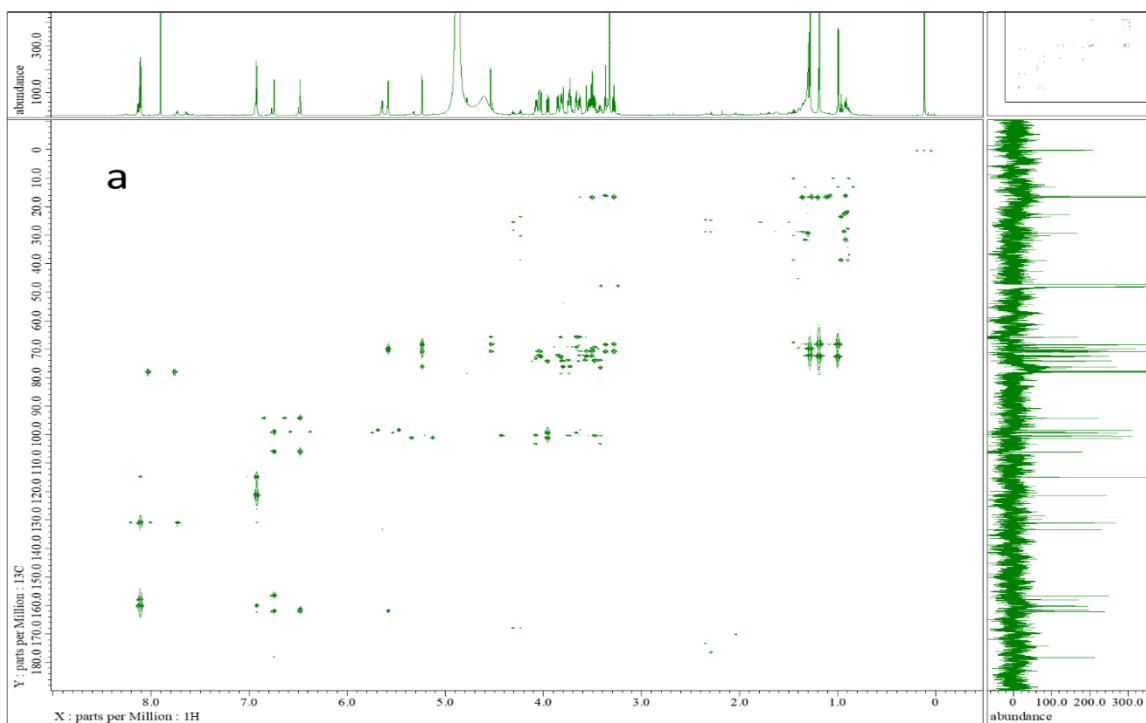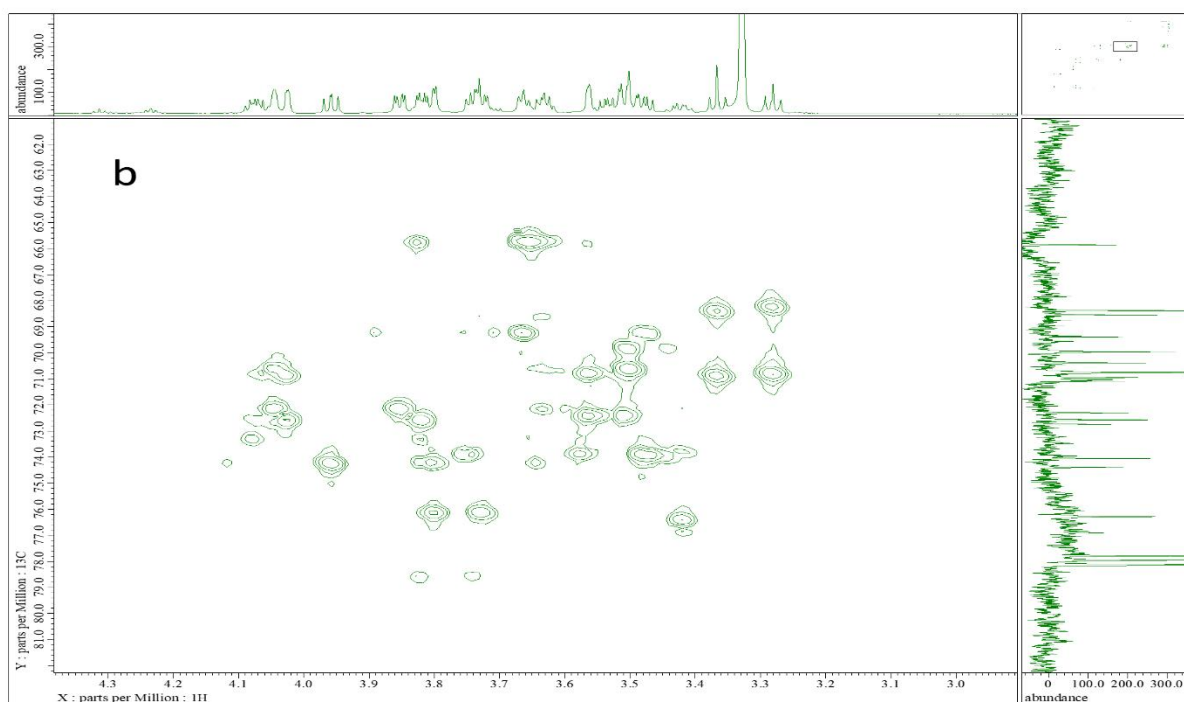

Figure S5. HMBC of compound 1 (CD<sub>3</sub>OD, 800 MHz)



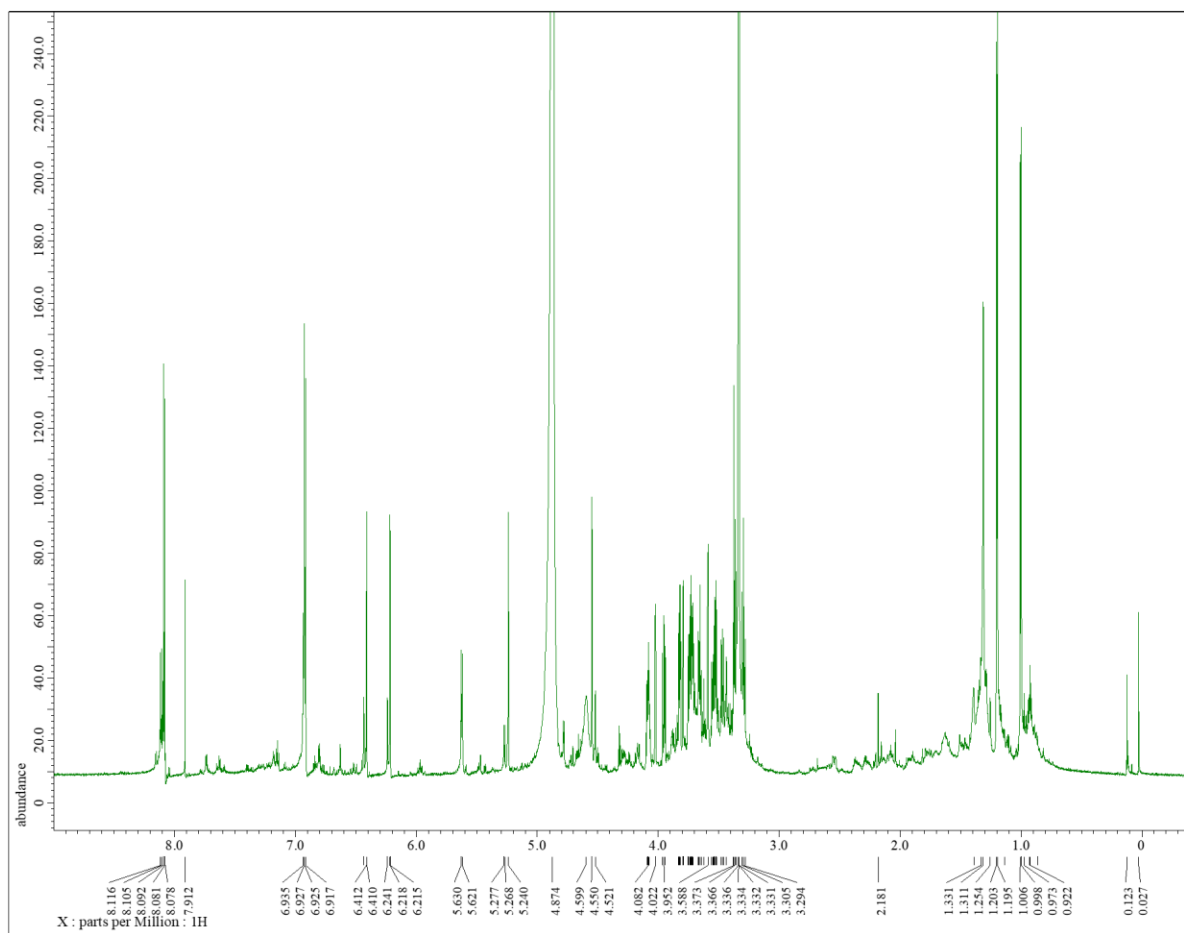

Figure S6. <sup>1</sup>H NMR spectrum of compound 2 (CD<sub>3</sub>OD, 800 MHz)

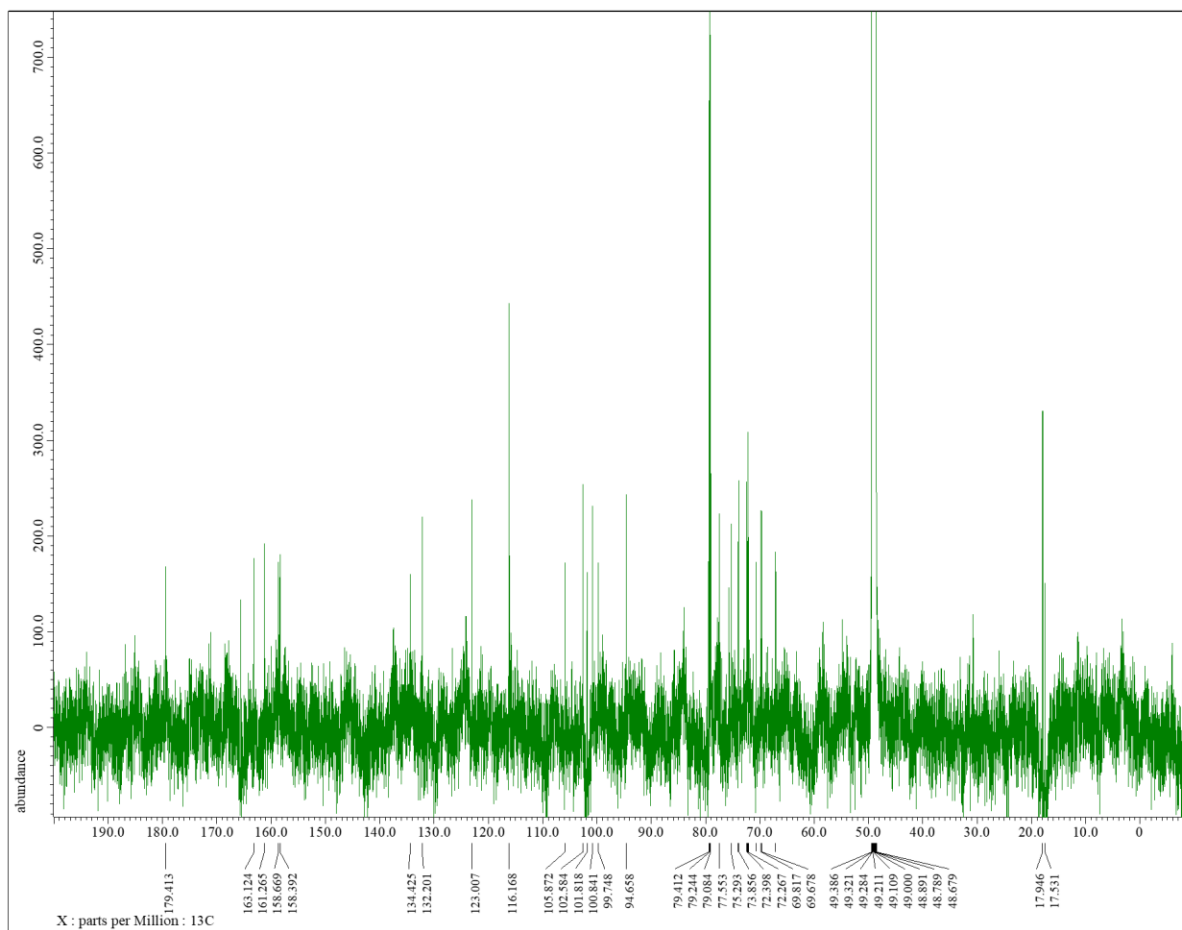

Figure S7.  $^{13}\text{C}$  NMR spectrum of compound 2 ( $\text{CD}_3\text{OD}$ , 800 MHz)

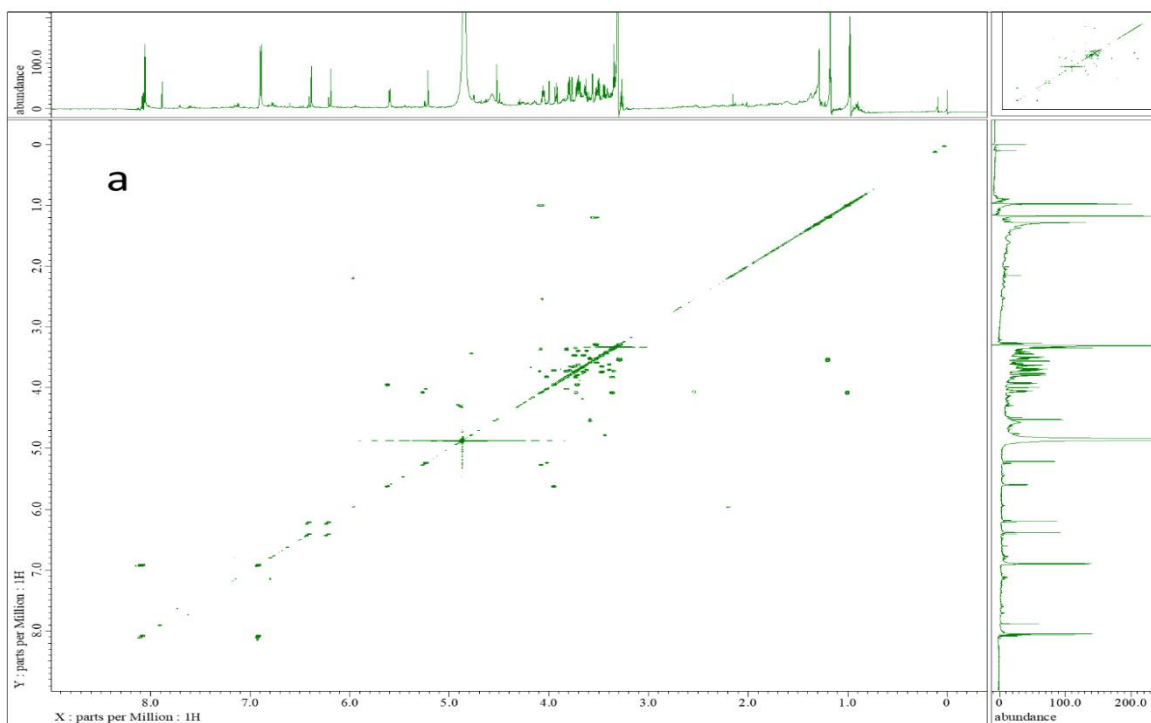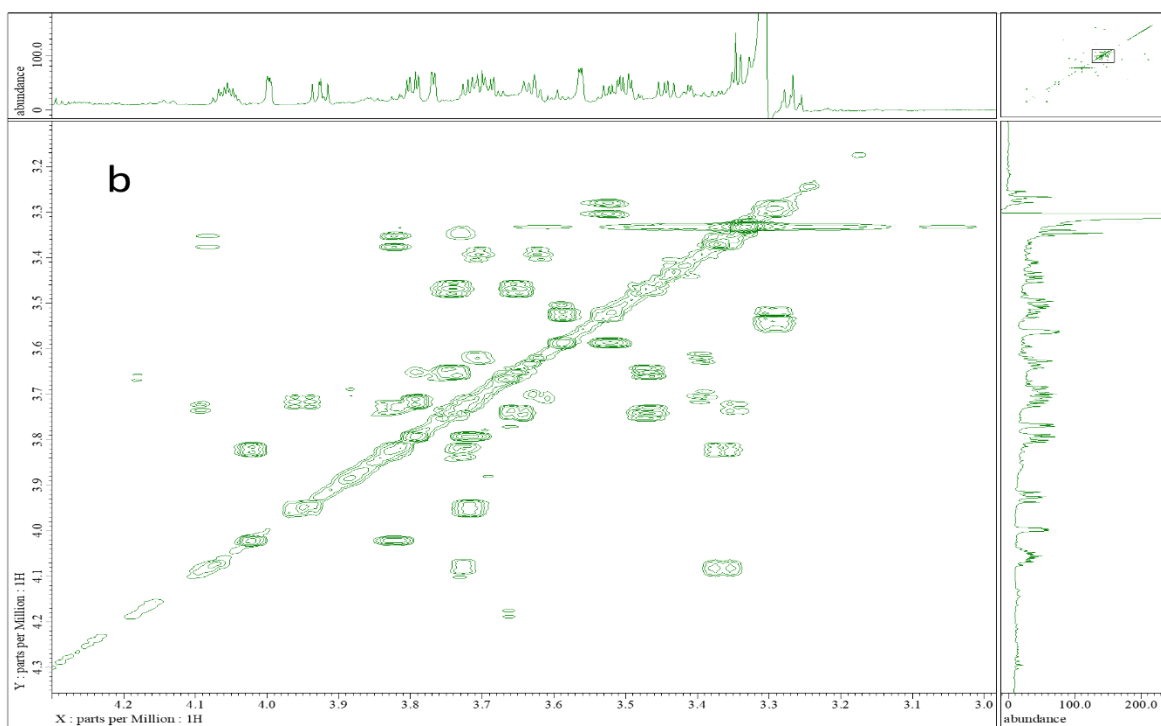

Figure S8.  $^1\text{H}$ - $^1\text{H}$  COSY of compound 2 ( $\text{CD}_3\text{OD}$ , 800 MHz)

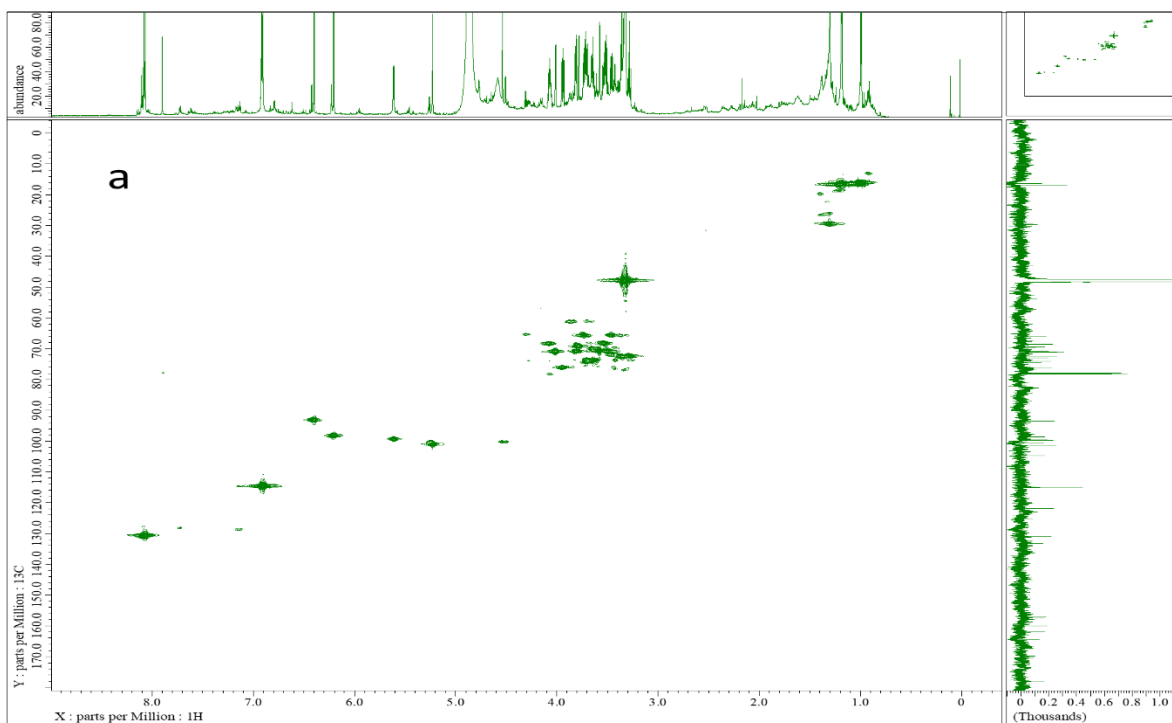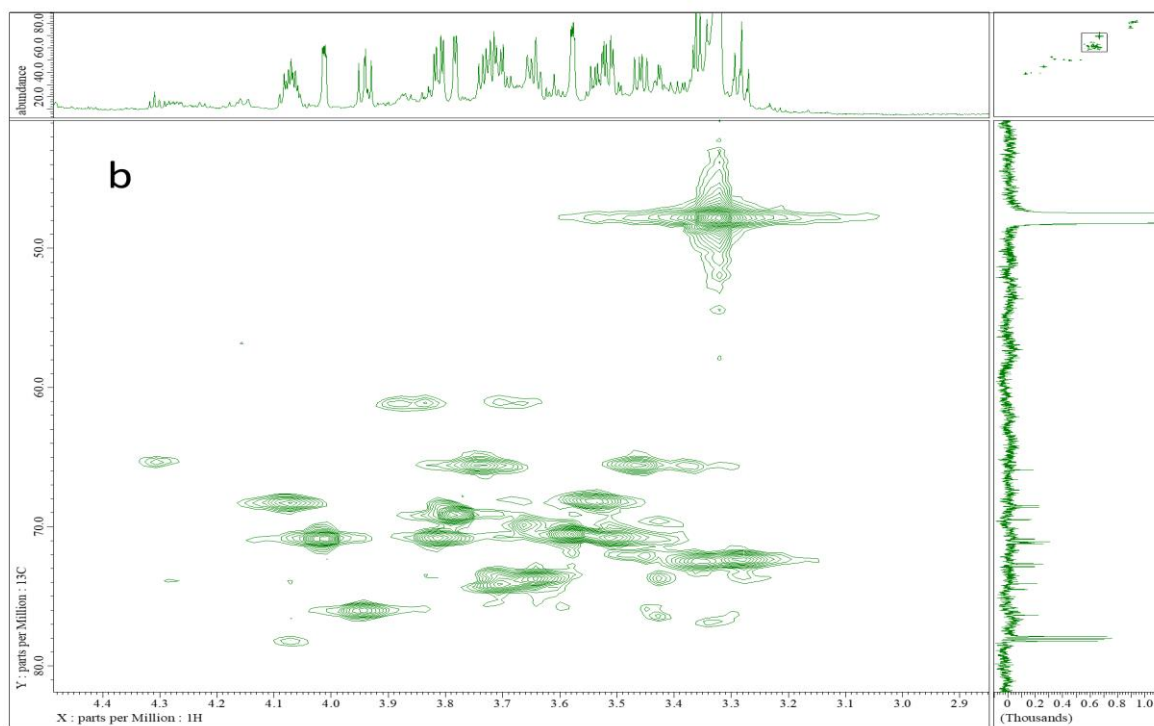

Figure S9. HMQC of compound 2 ( $\text{CD}_3\text{OD}$ , 800 MHz)

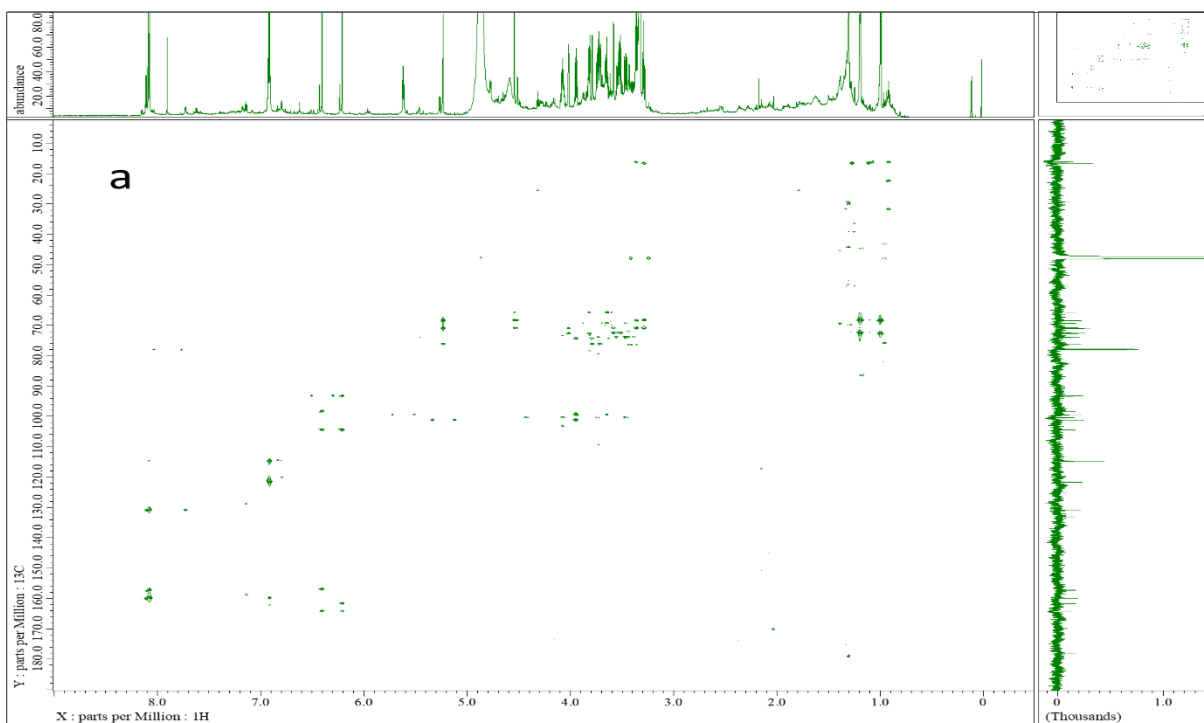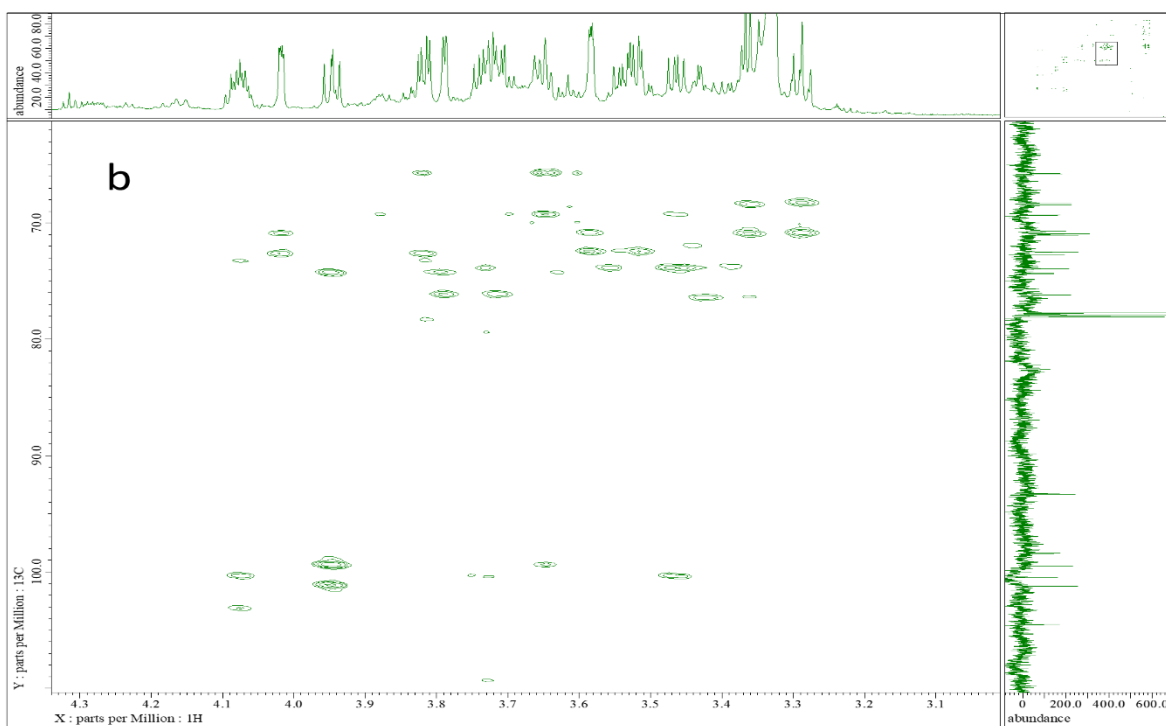

Figure S10. HMBC of compound 2 (CD<sub>3</sub>OD, 800 MHz)

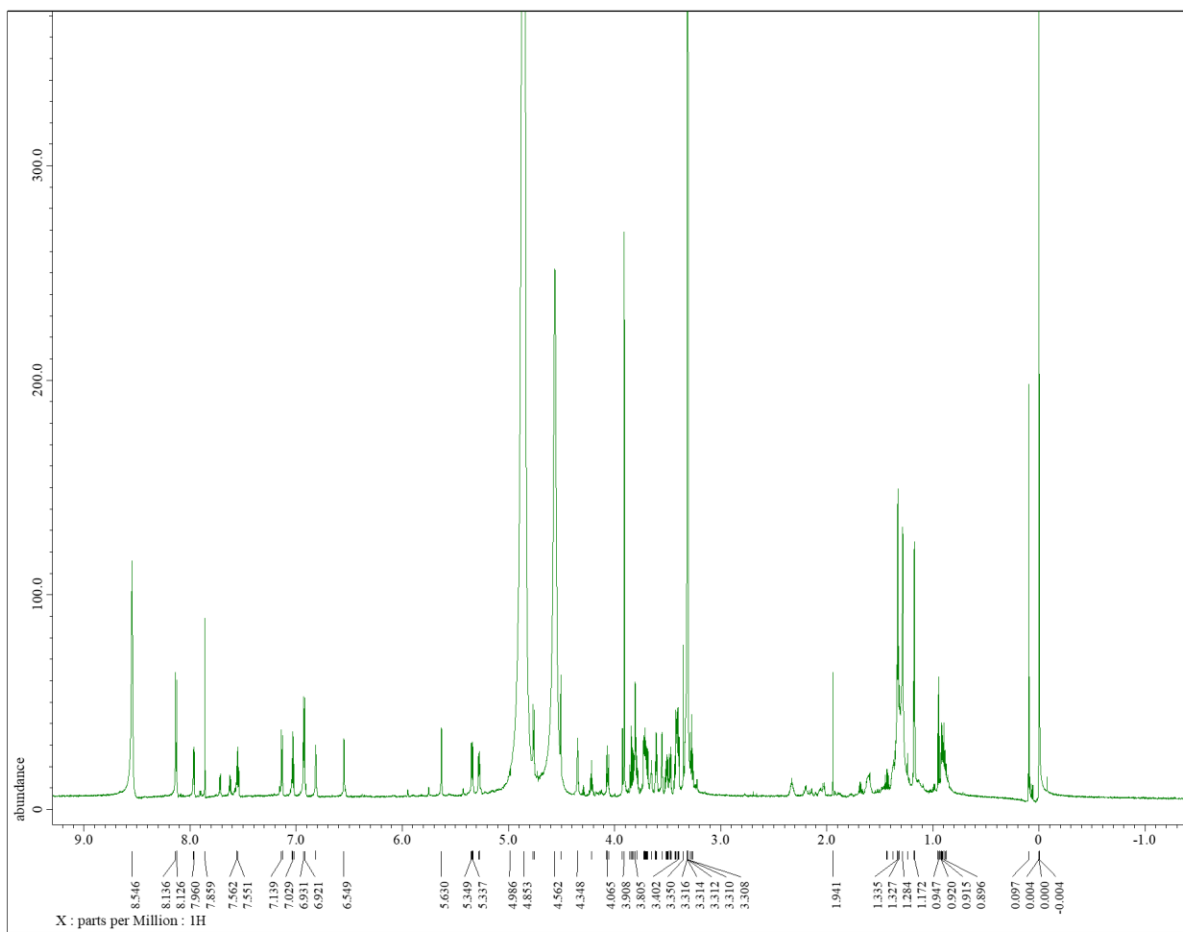

**Figure S11.**  $^1\text{H}$  NMR spectrum of compound **3** ( $\text{CD}_3\text{OD}$ , 800 MHz)

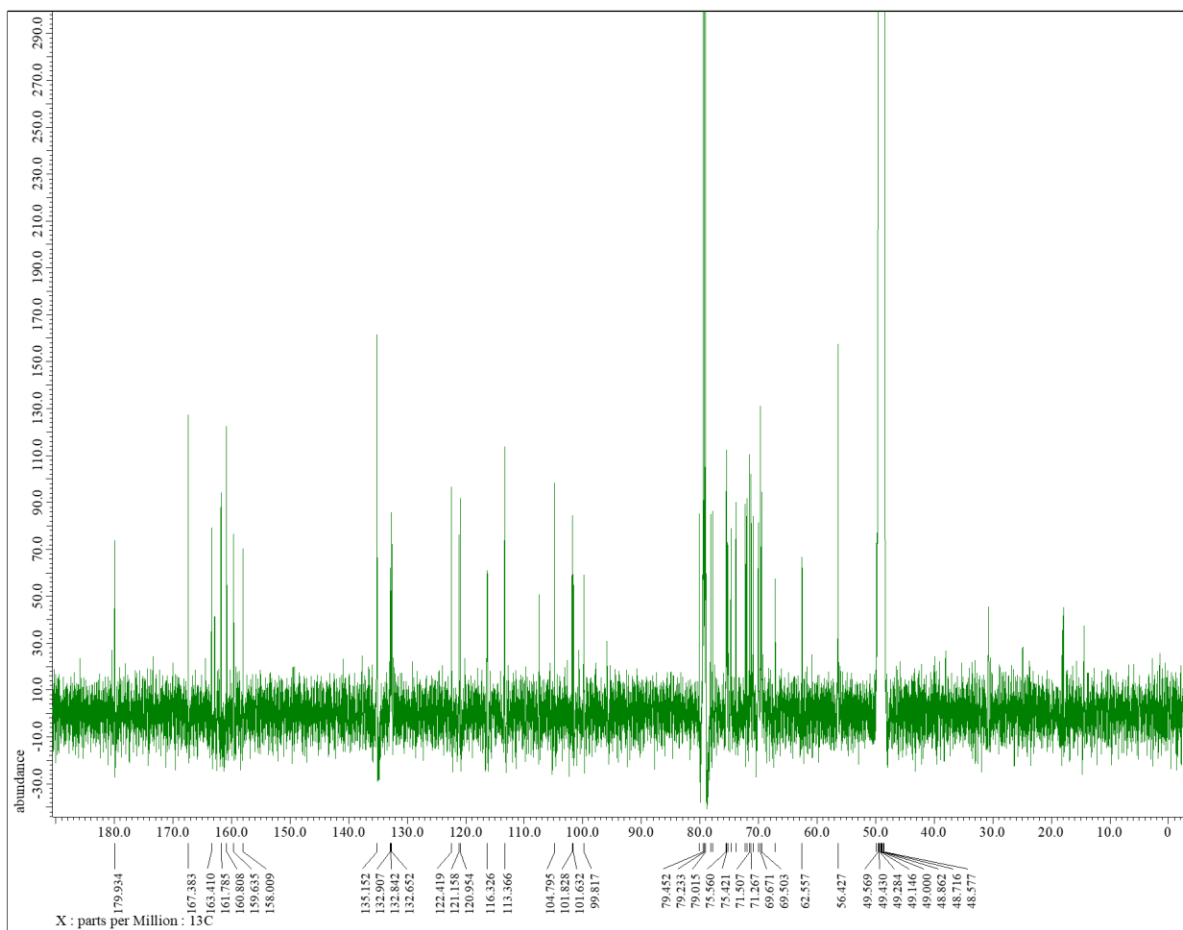

**Figure S12.**  $^{13}\text{C}$  NMR spectrum of compound **3** ( $\text{CD}_3\text{OD}$ , 800 MHz)

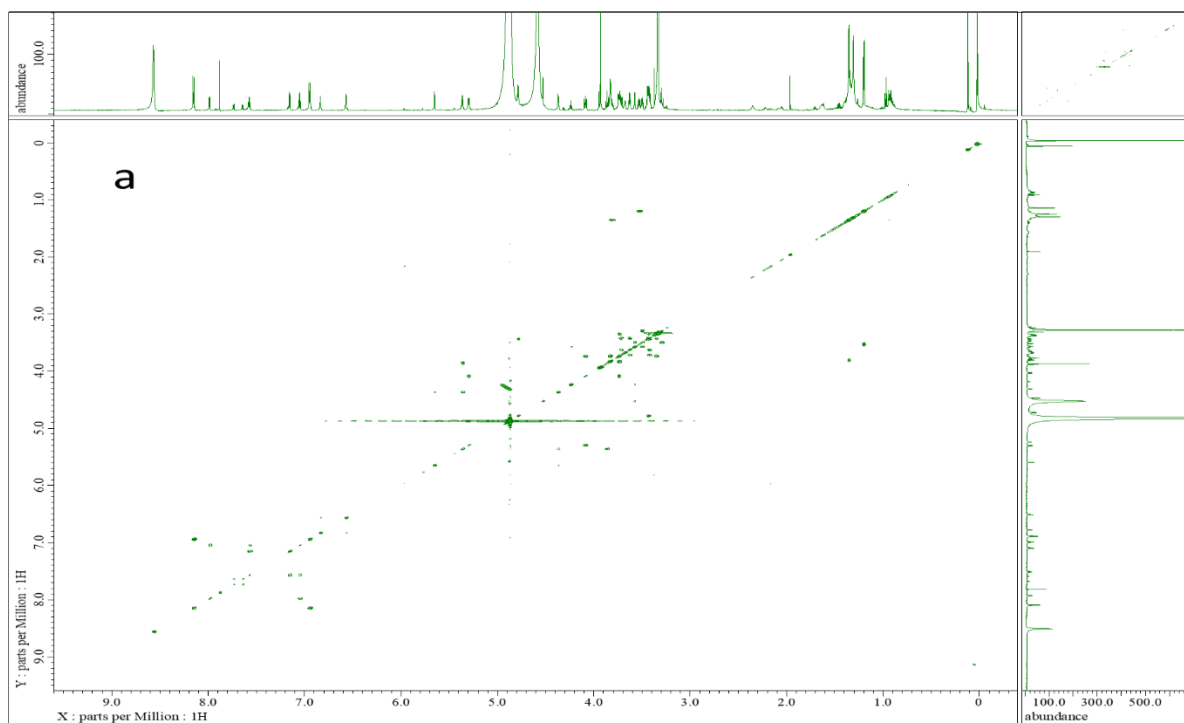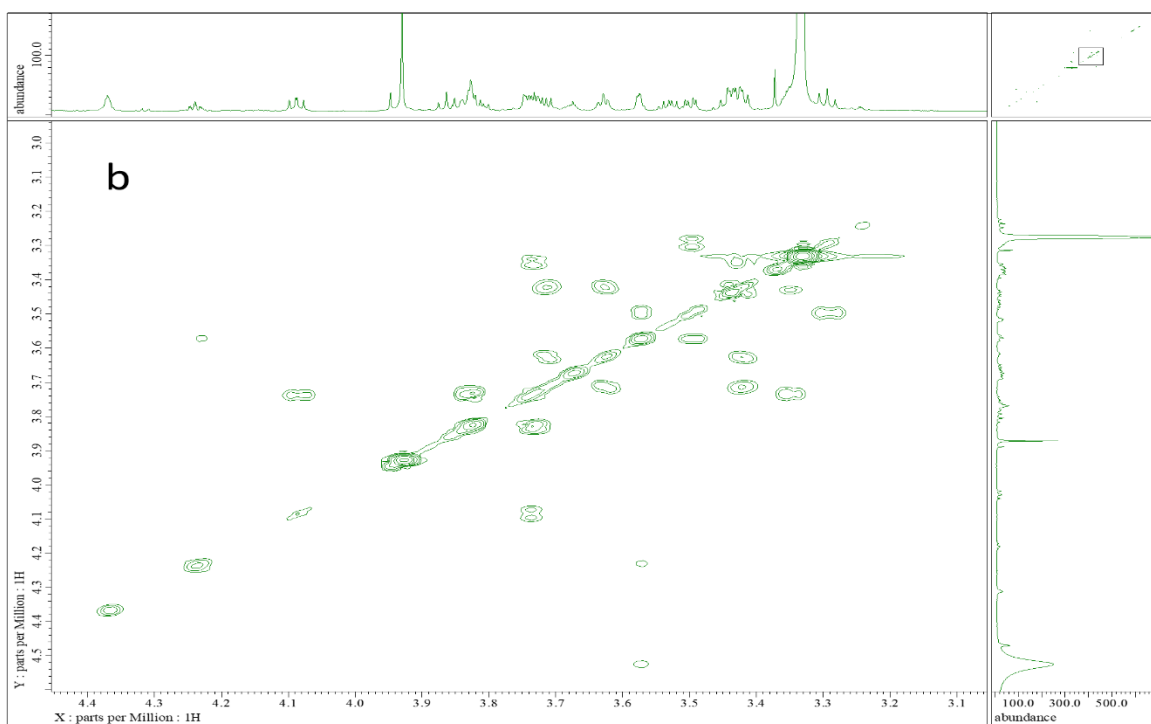

Figure S13.  $^1\text{H}$ - $^1\text{H}$  COSY of compound 3 ( $\text{CD}_3\text{OD}$ , 800 MHz)



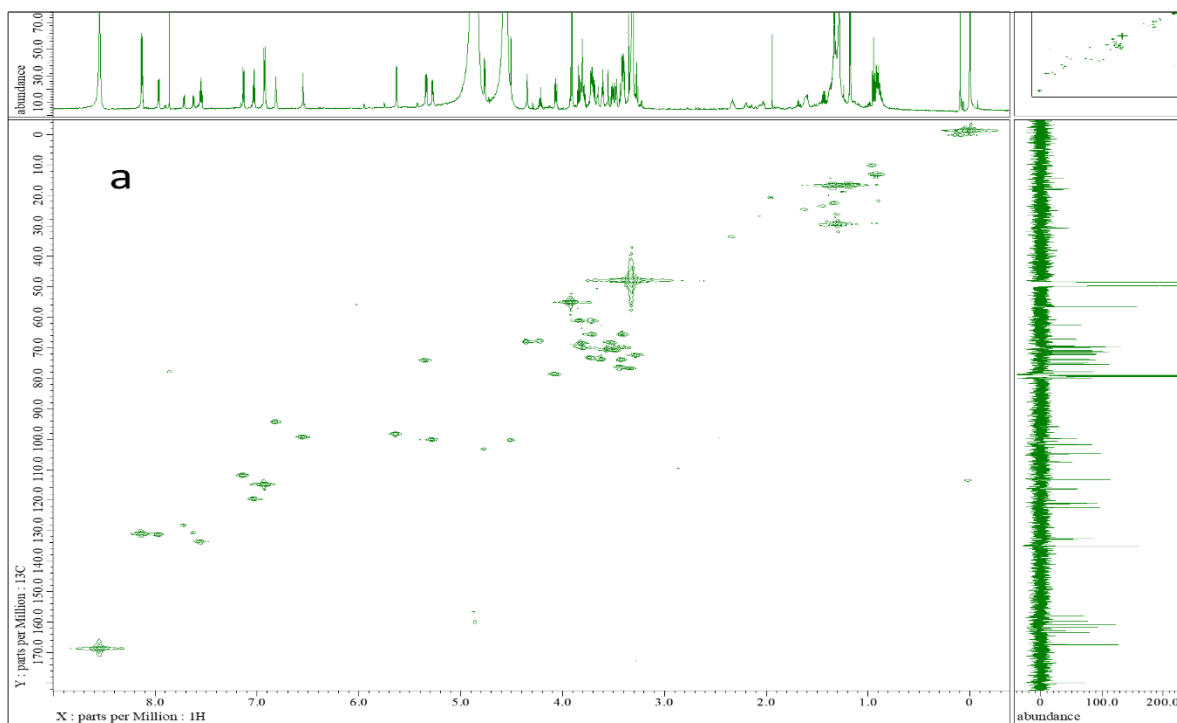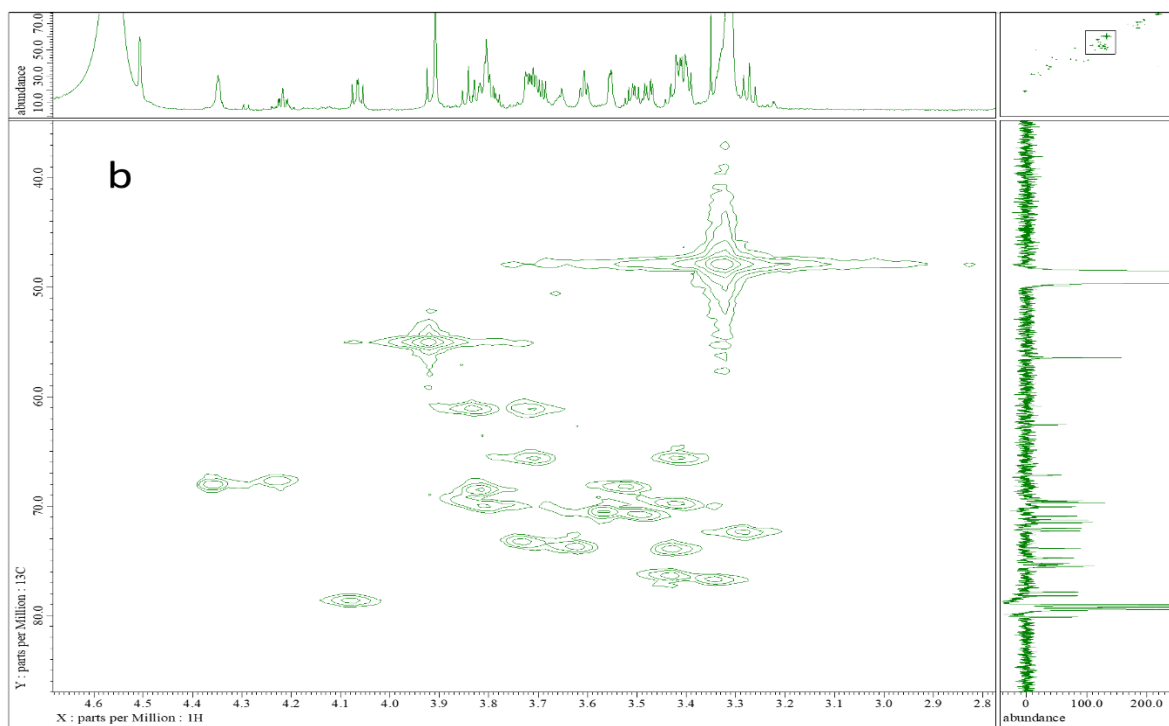

Figure S14. HMQC of compound 3 (CD<sub>3</sub>OD, 800 MHz)

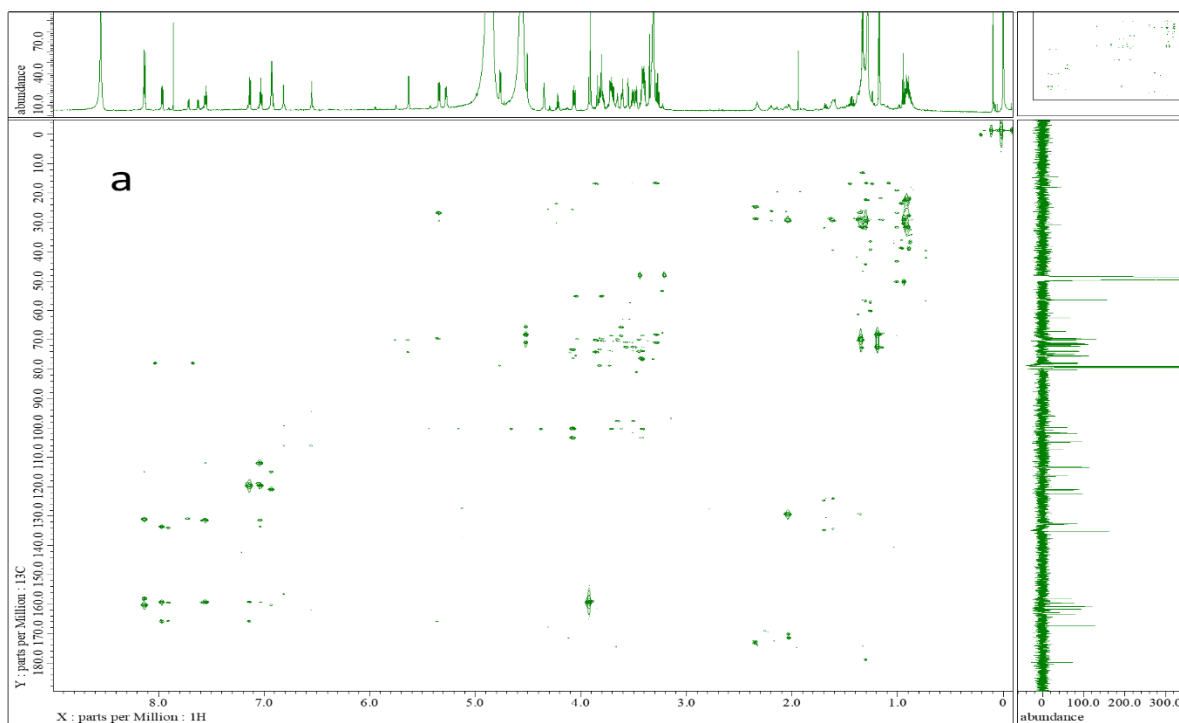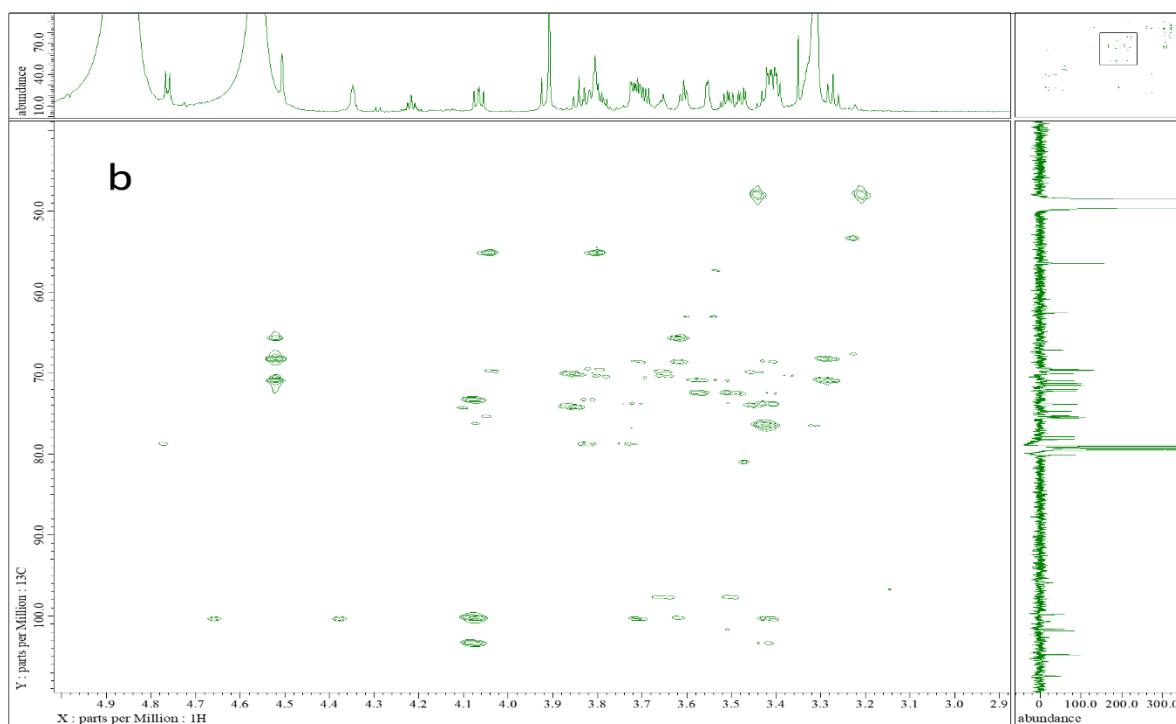

Figure S15. HMBC of compound 3 (CD<sub>3</sub>OD, 800 MHz)

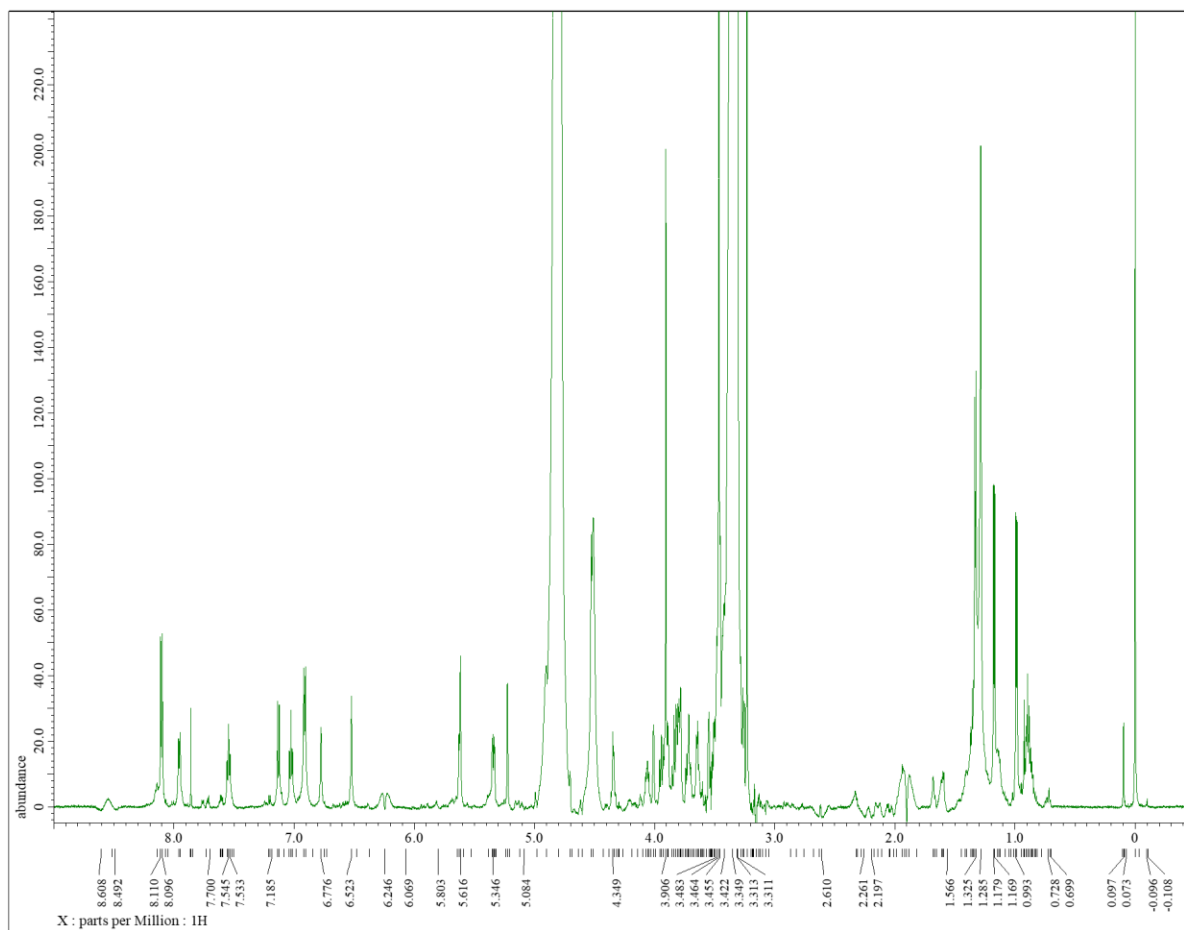

**Figure S16.** <sup>1</sup>H NMR spectrum of compound 4 (CD<sub>3</sub>OD, 600 MHz)

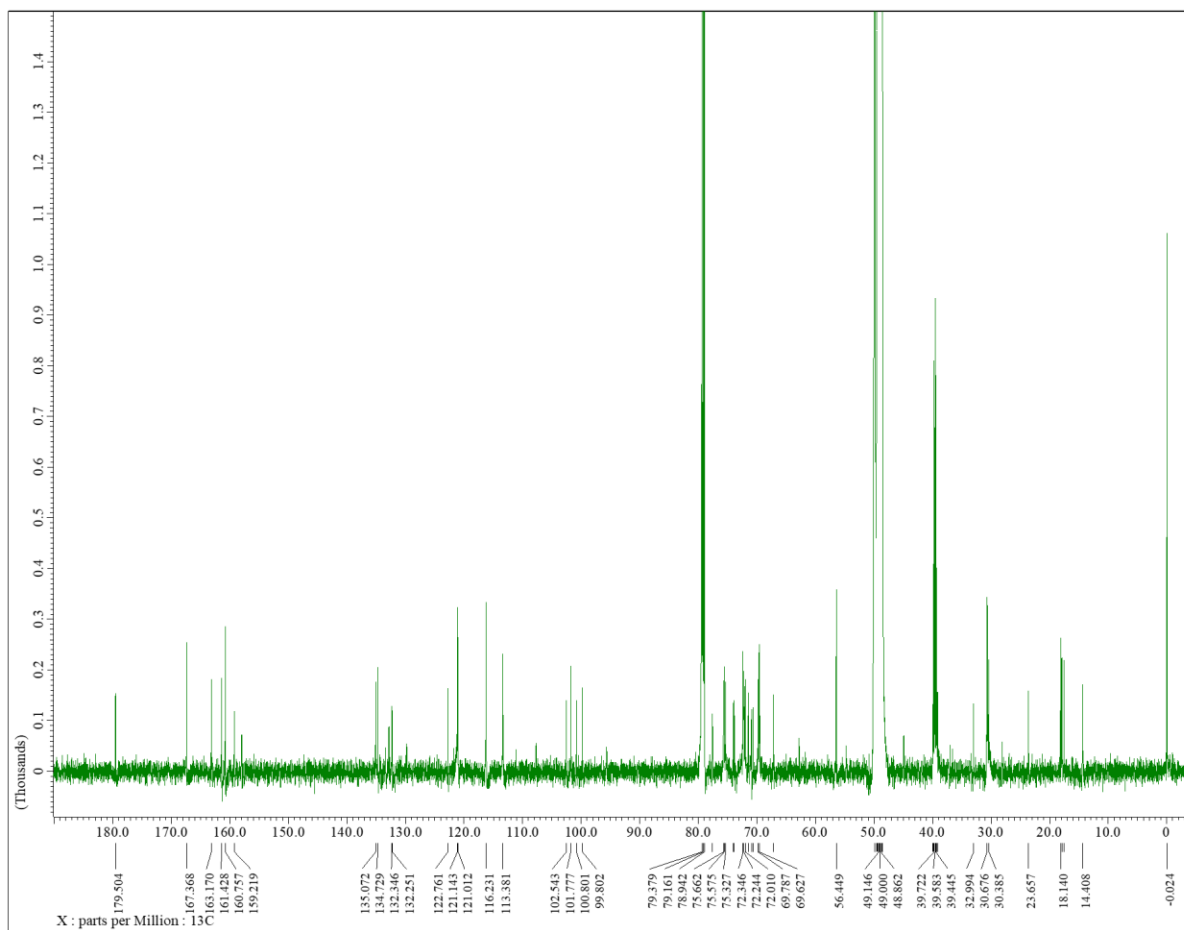

**Figure S17.**  $^{13}\text{C}$  NMR spectrum of compound **4** ( $\text{CD}_3\text{OD}$ , 600 MHz)

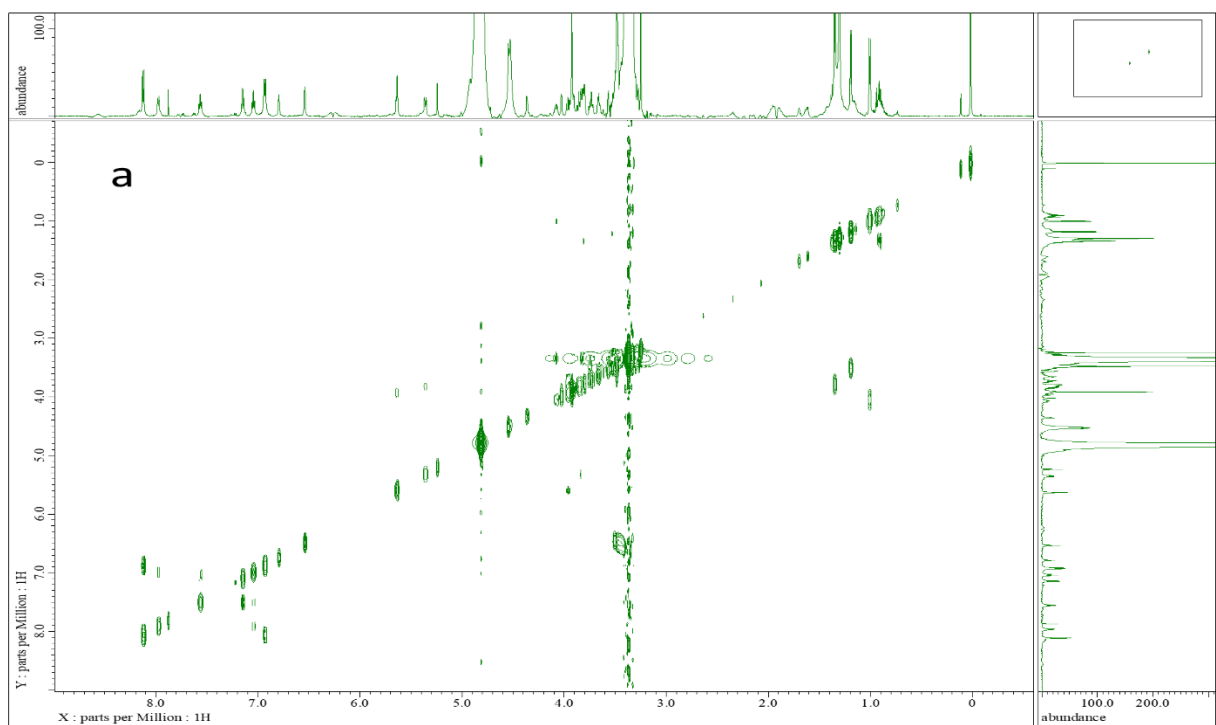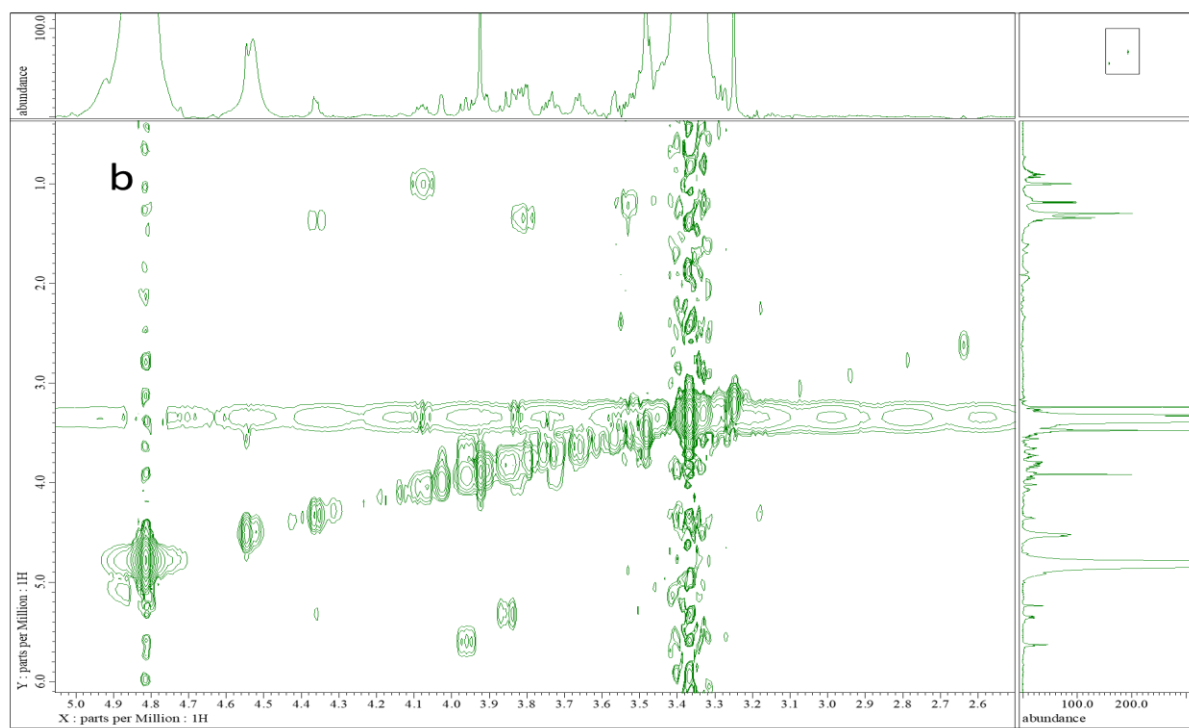

Figure S18.  $^1\text{H}$ - $^1\text{H}$  COSY of compound 4 ( $\text{CD}_3\text{OD}$ , 600 MHz)

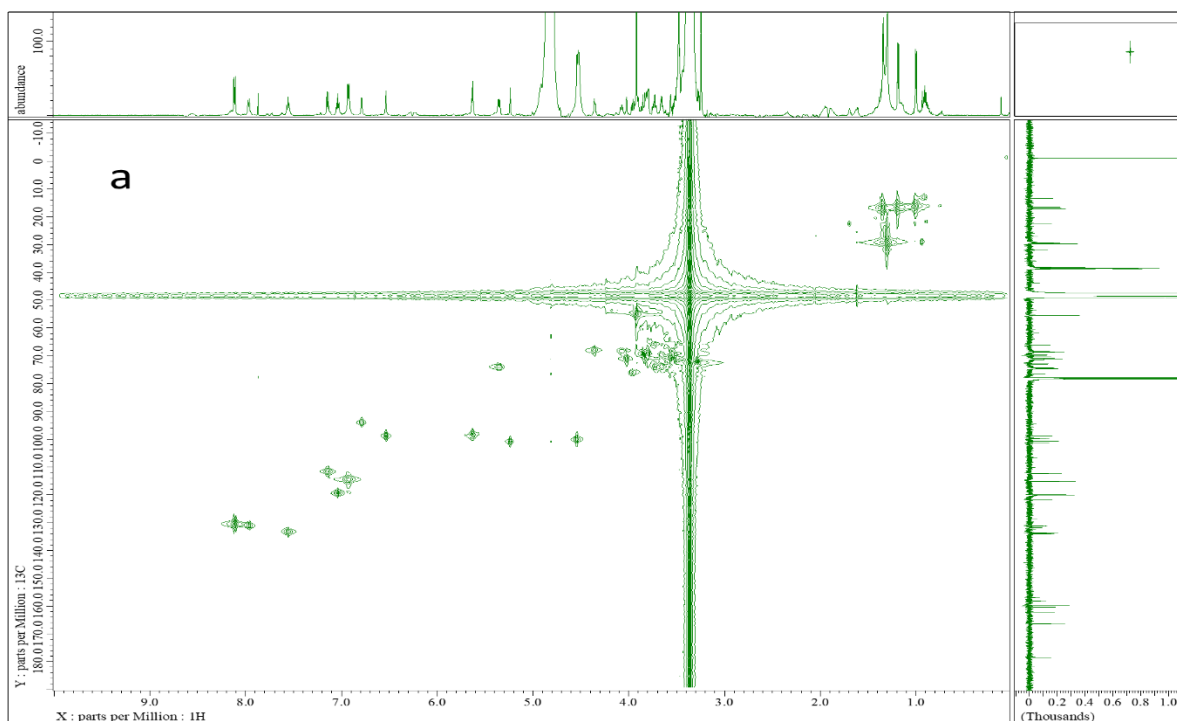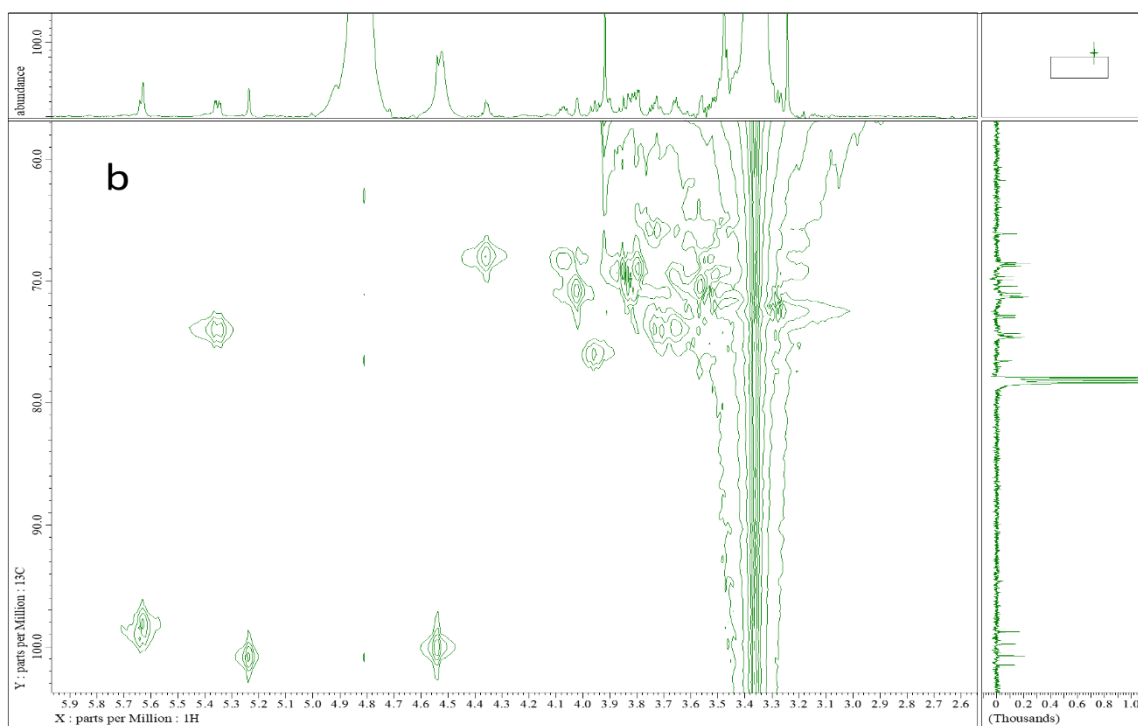

Figure S19. HMQC of compound 4 (CD<sub>3</sub>OD, 600 MHz)

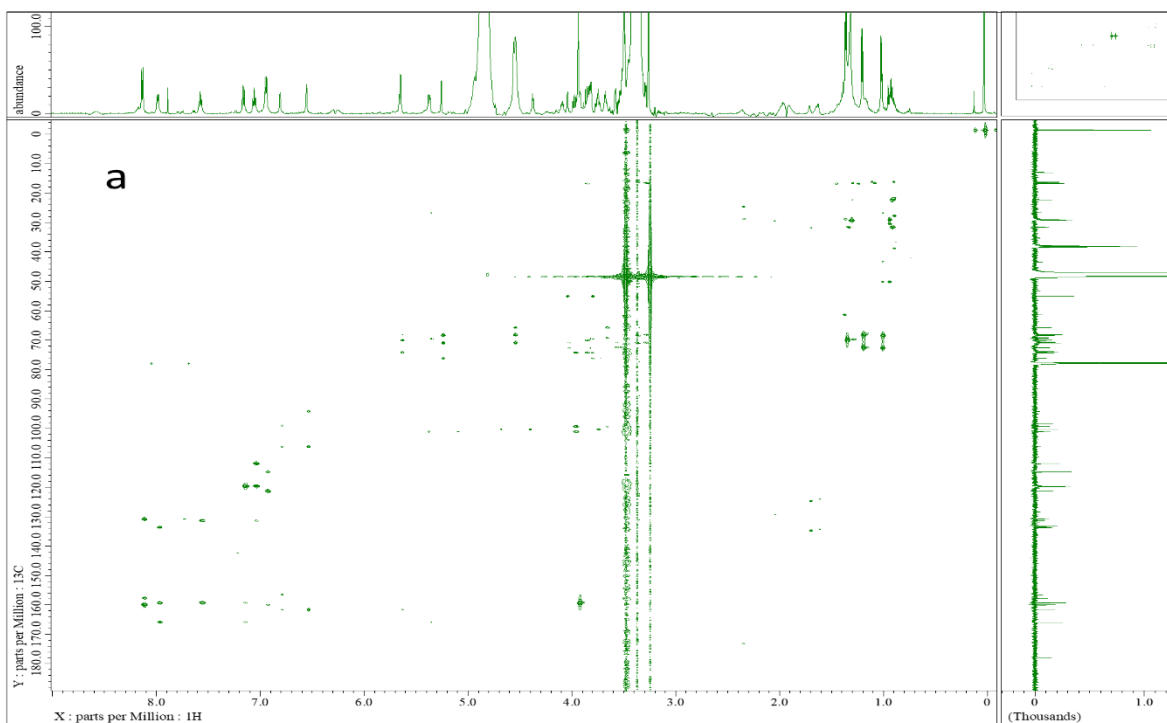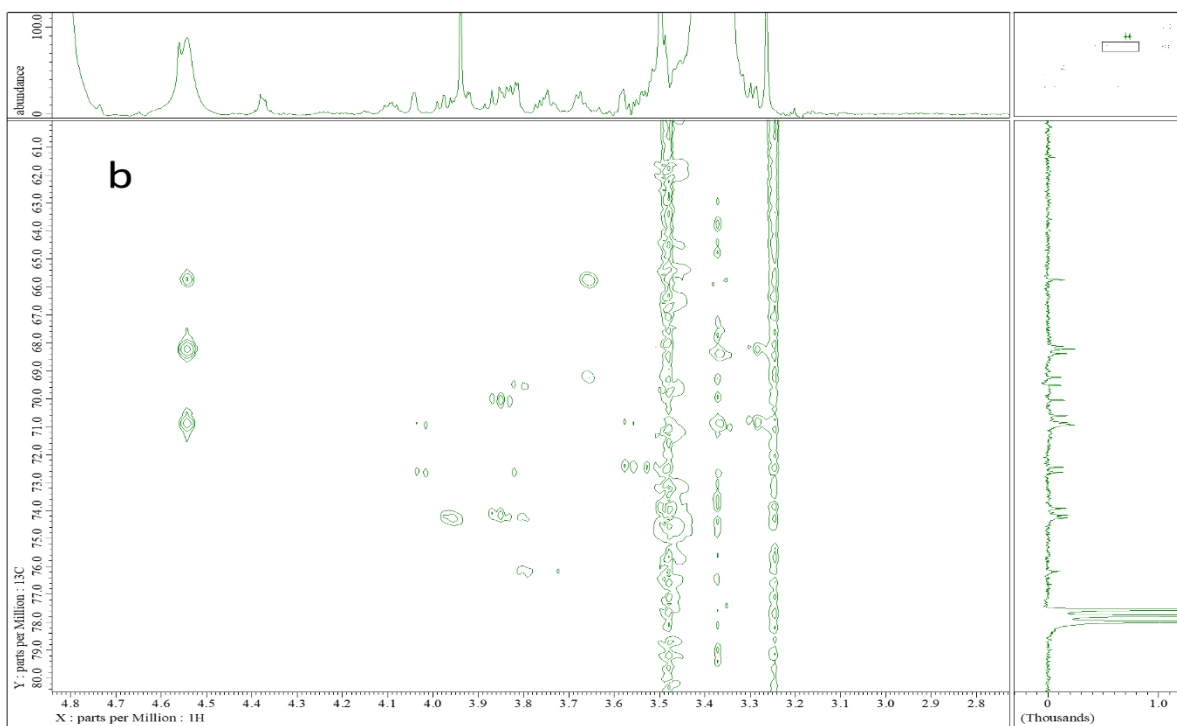

Figure S20. HMBC of compound 4 (CD<sub>3</sub>OD, 600 MHz)

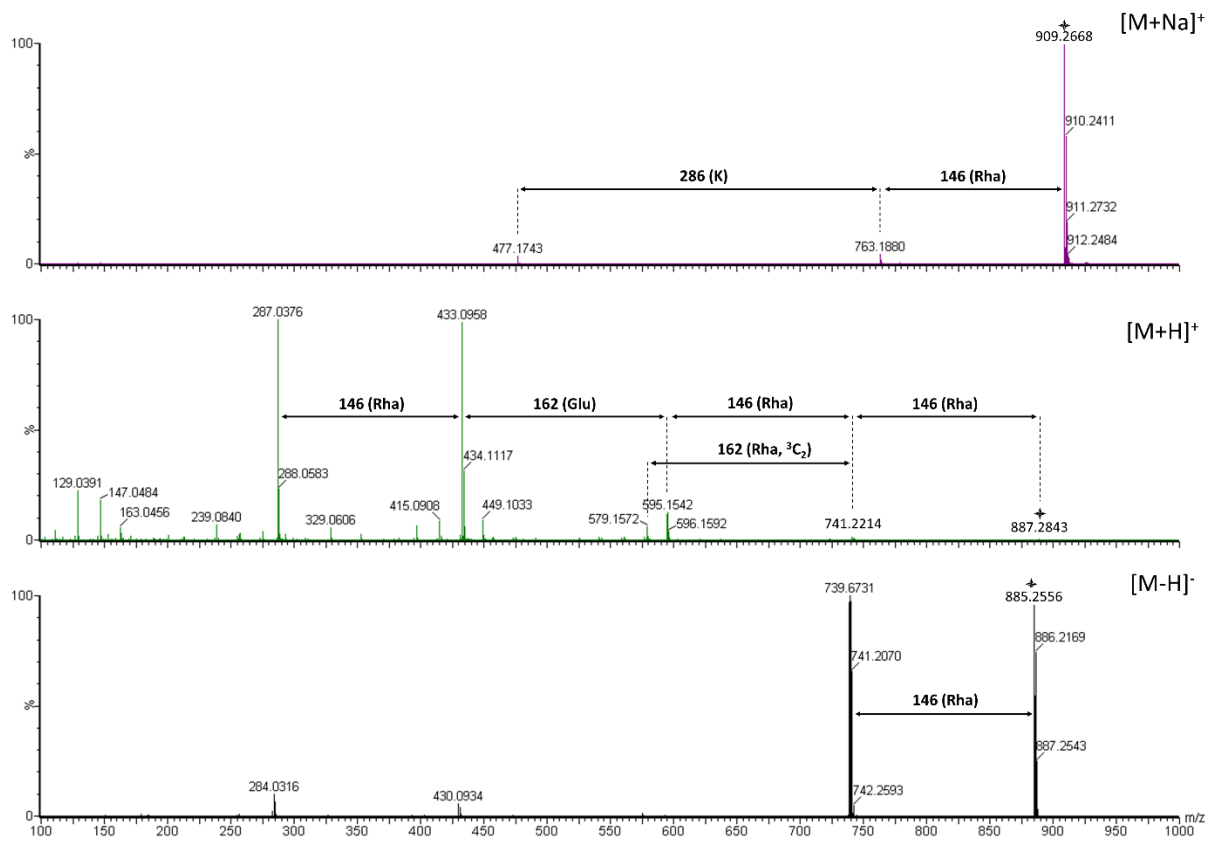

Figure S21. LC/ESI/MS/MS data of compound 1



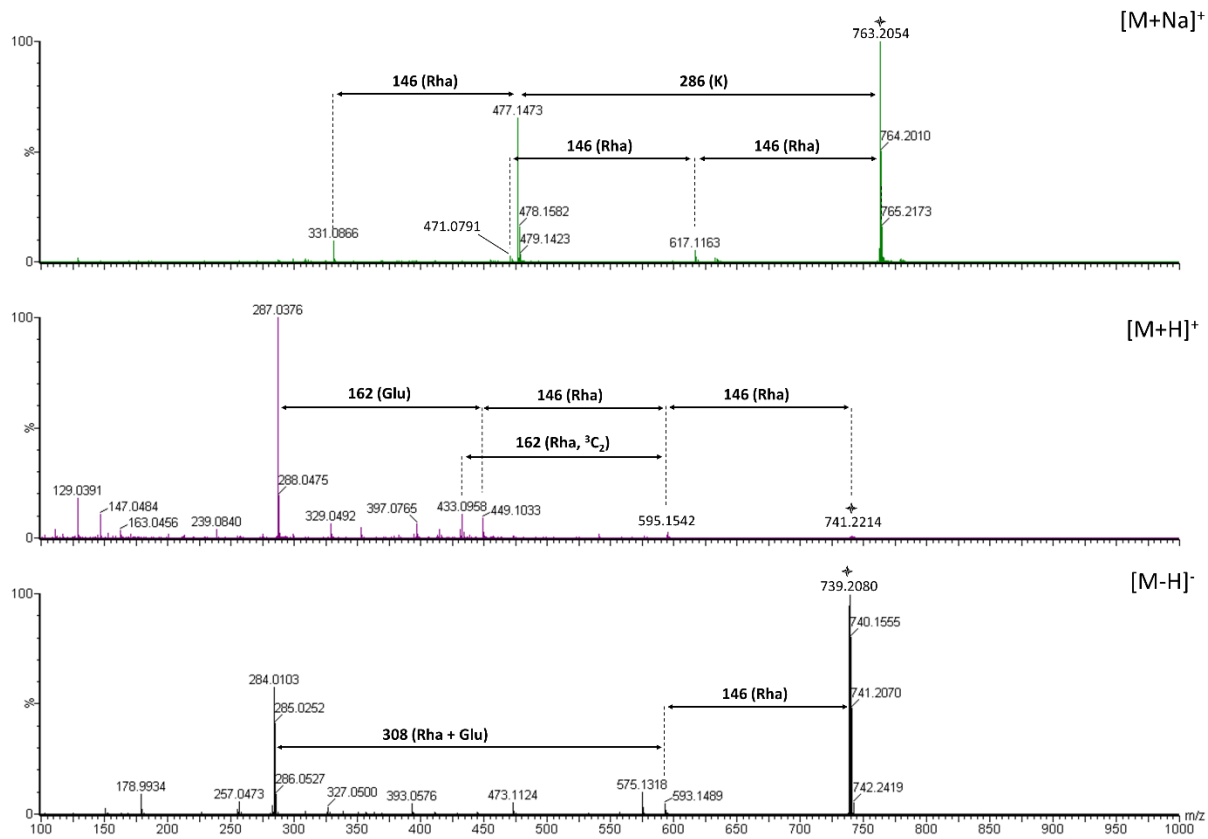

Figure S22. LC/ESI/MS/MS data of compound 2

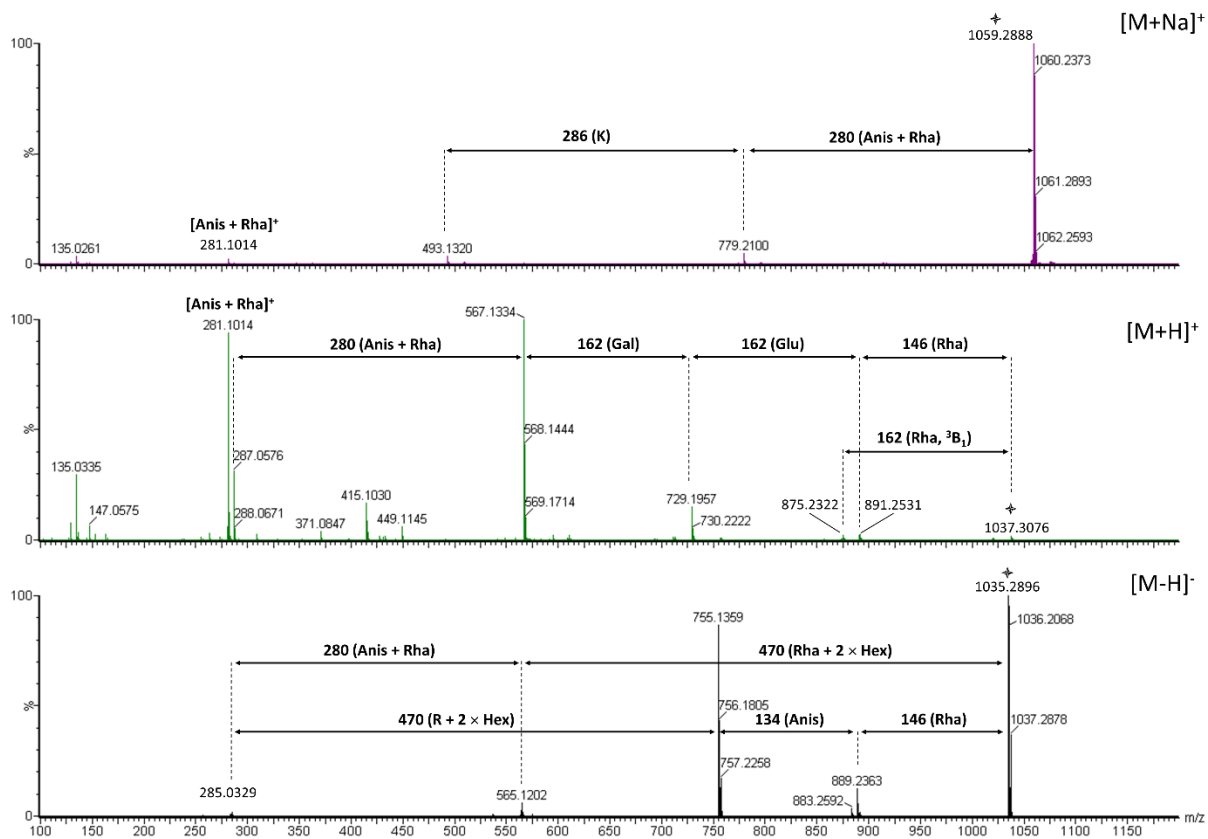

Figure S23. LC/ESI/MS/MS data of compound 3

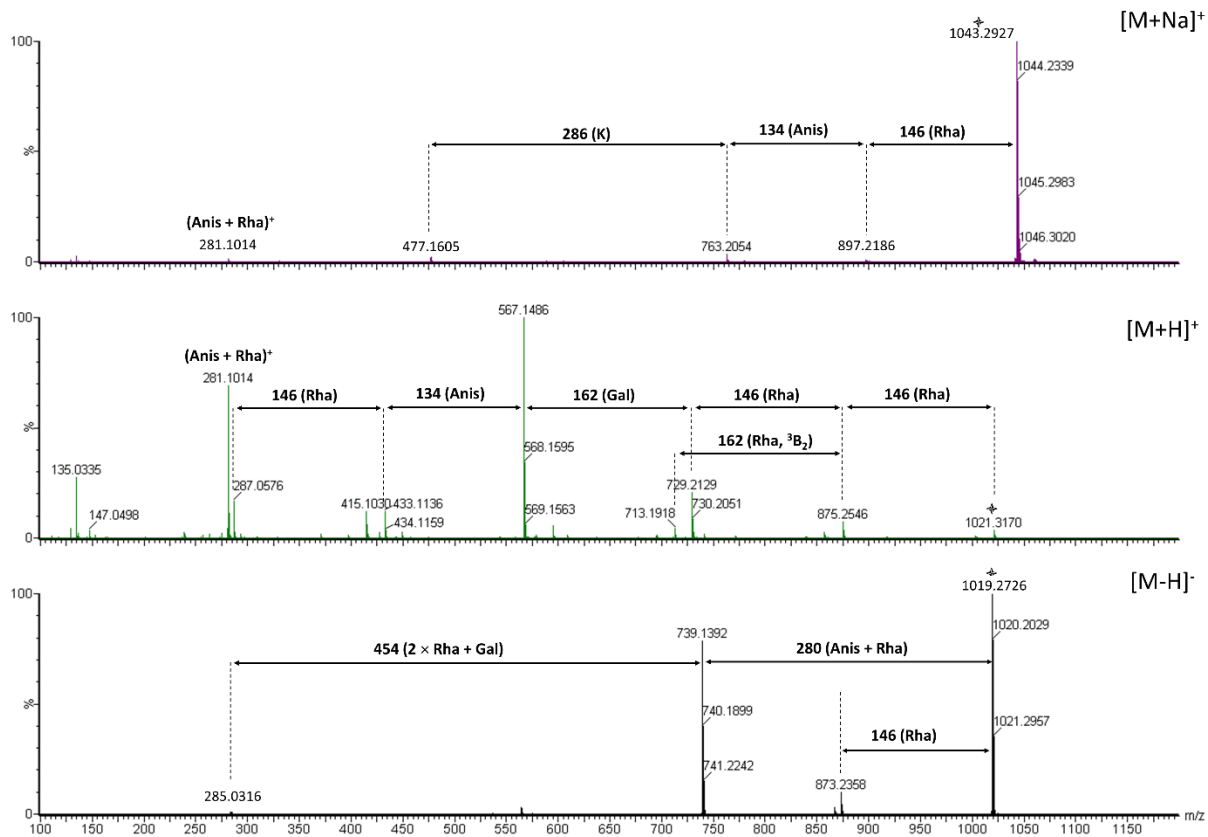

Figure S24. LC/ESI/MS/MS data of compound 4

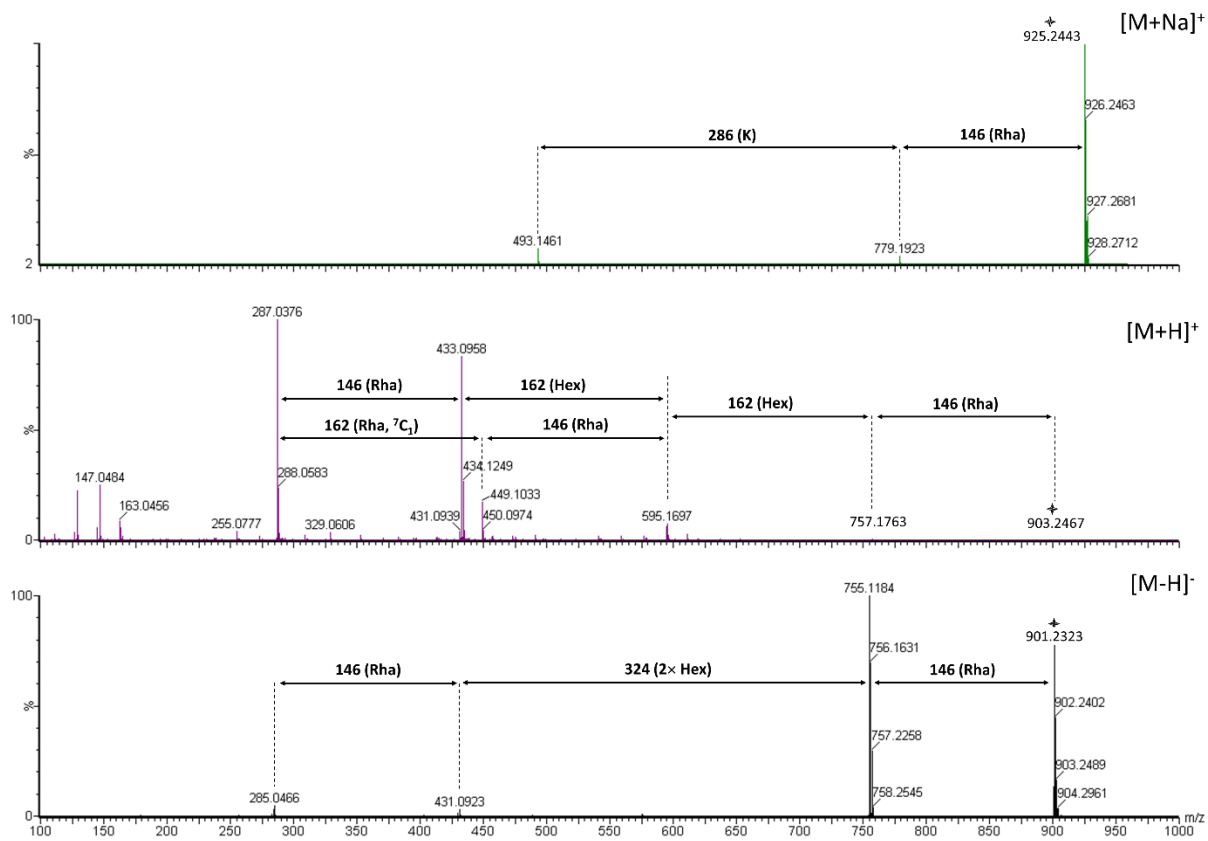

Figure S25. LC/ESI/MS/MS data of compound 5

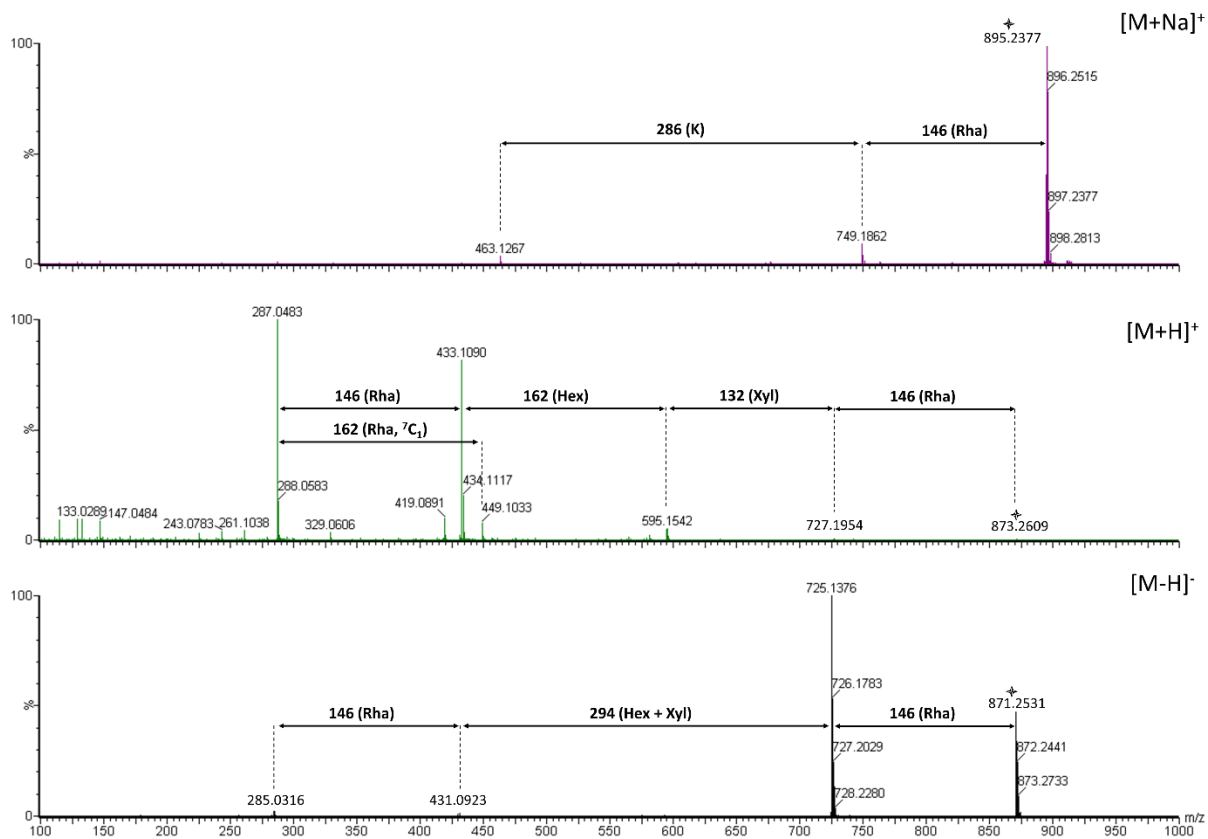

Figure S26. LC/ESI/MS/MS data of compound 6

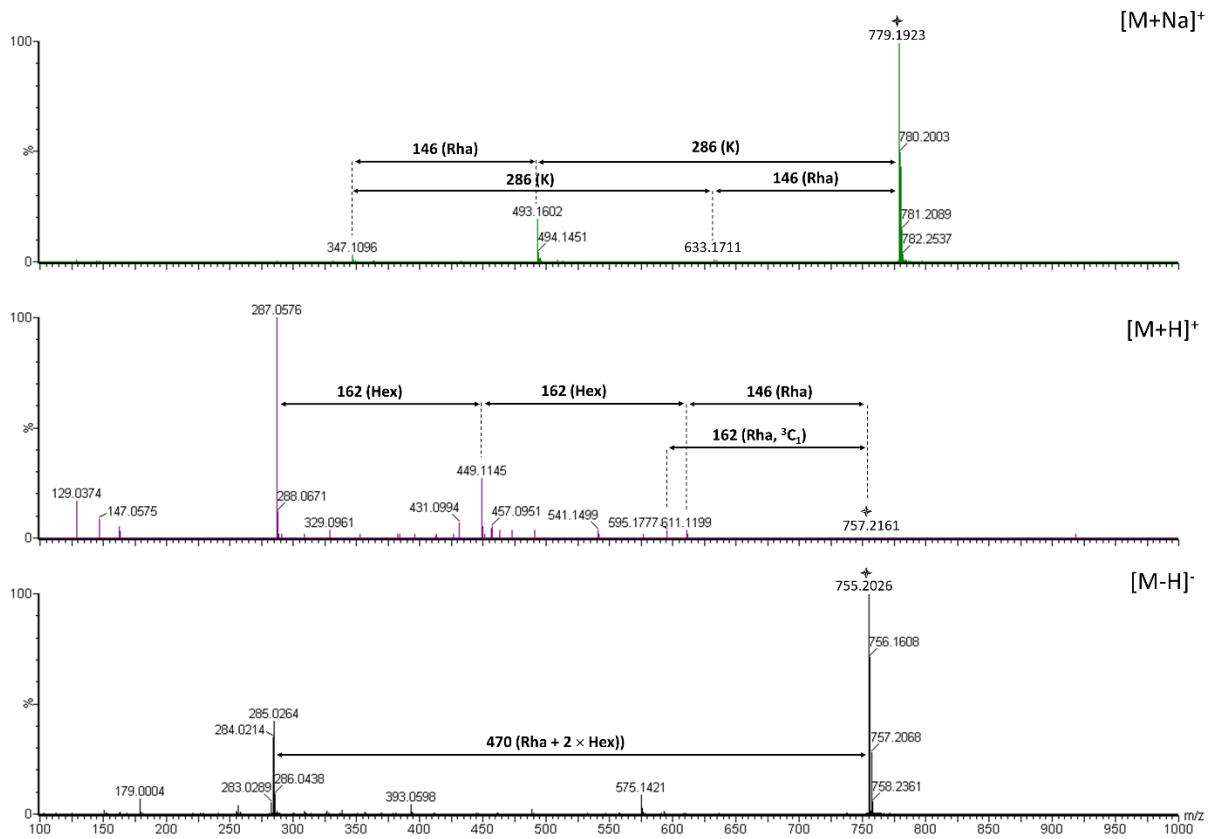

Figure S27. LC/ESI/MS/MS data of compound 7

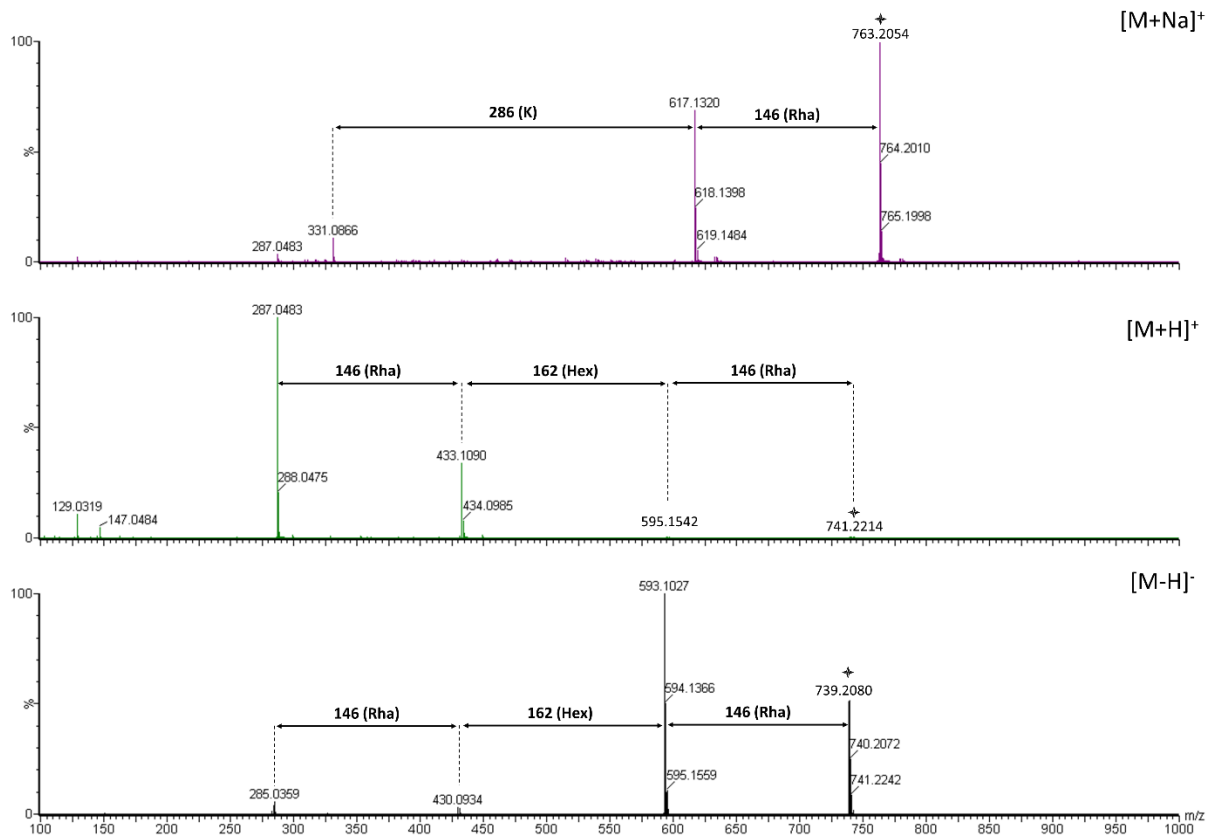

Figure S28. LC/ESI/MS/MS data of compound 8

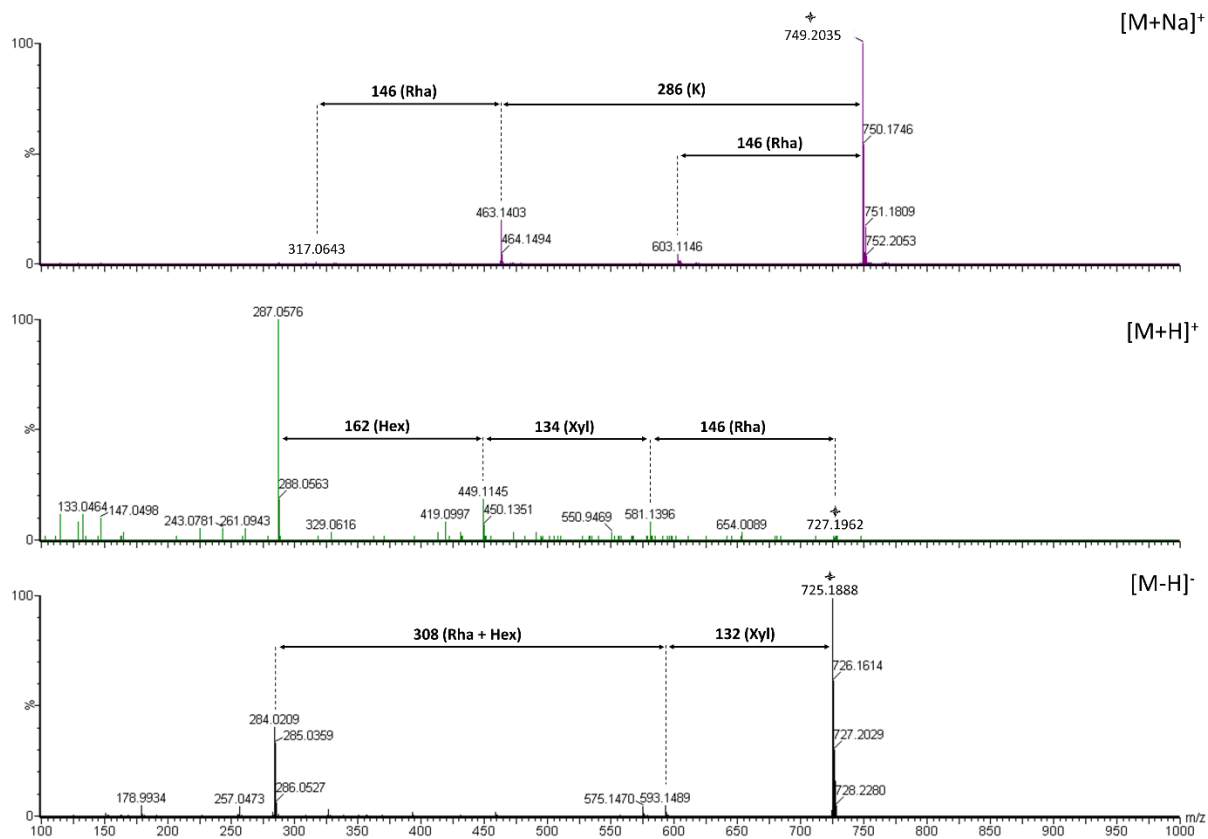

Figure S29. LC/ESI/MS/MS data of compound 9



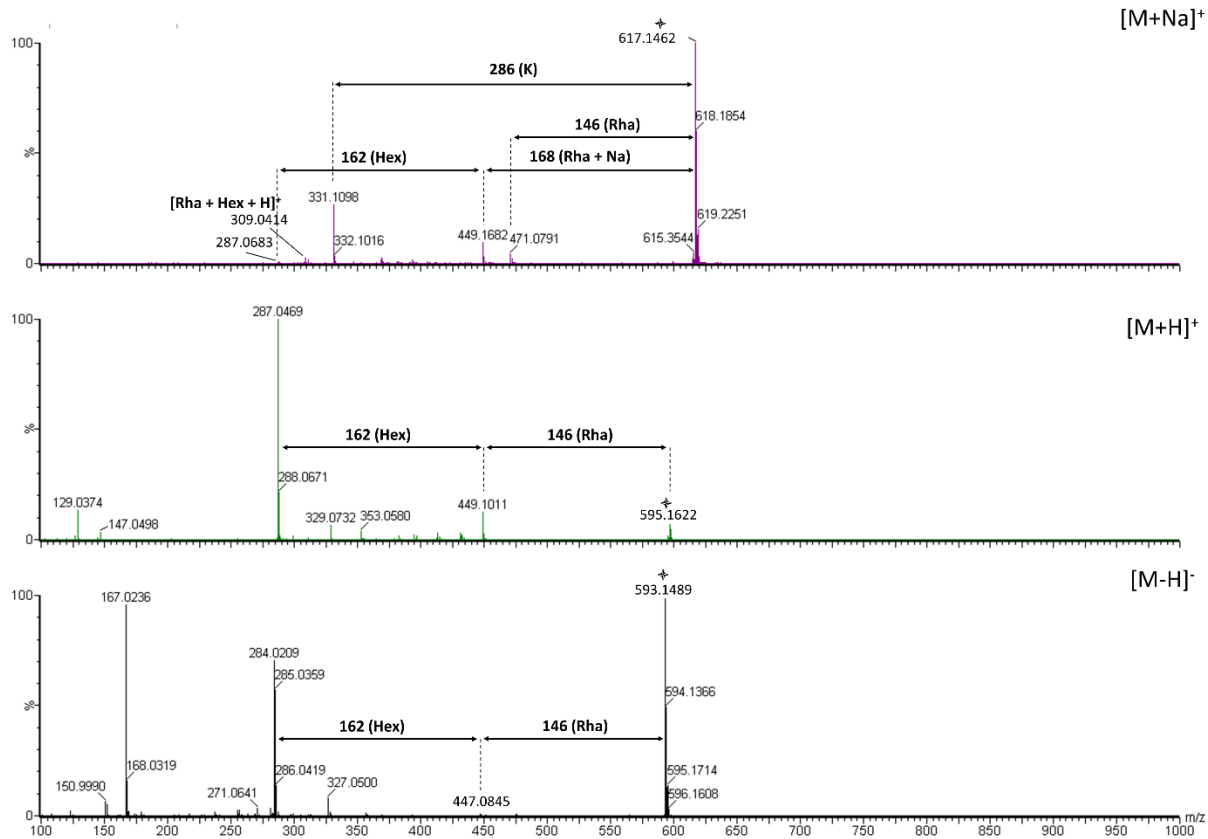

Figure S30. LC/ESI/MS/MS data of compound 10

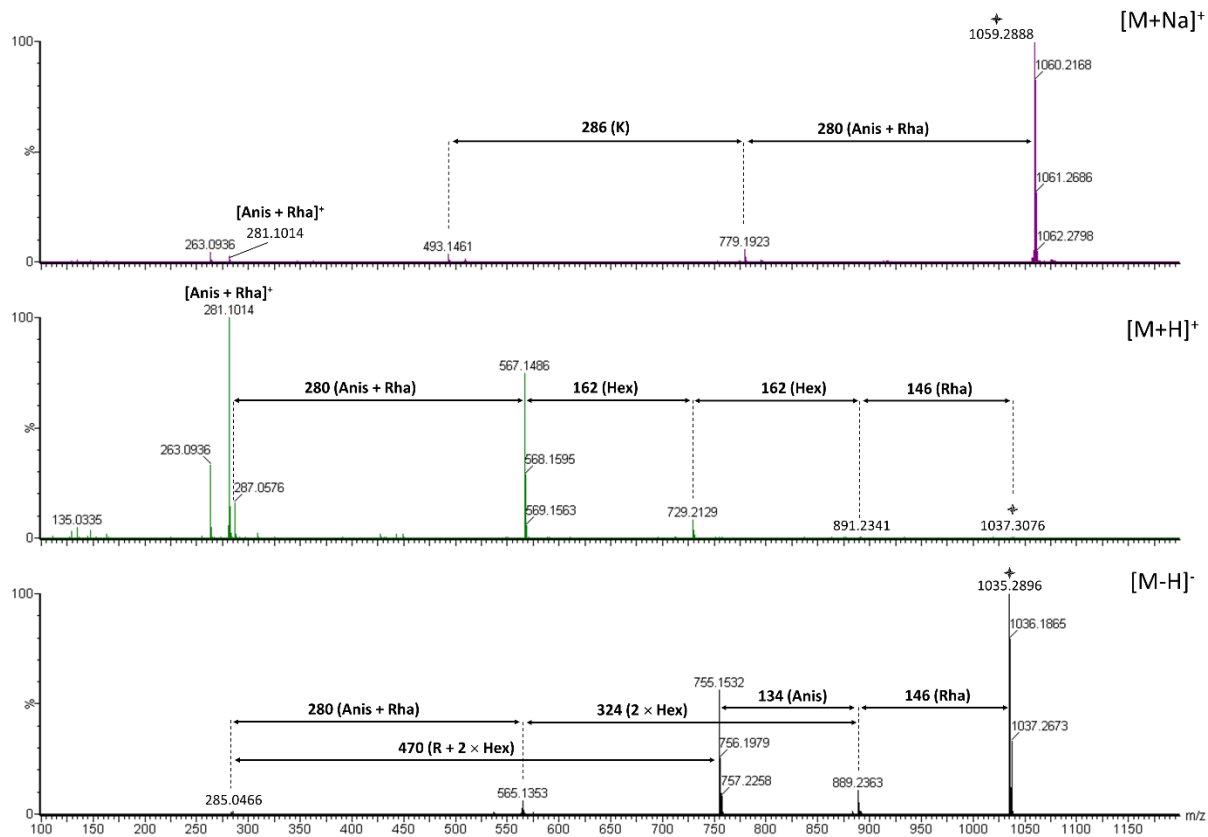

Figure S31. LC/ESI/MS/MS data of compound 11

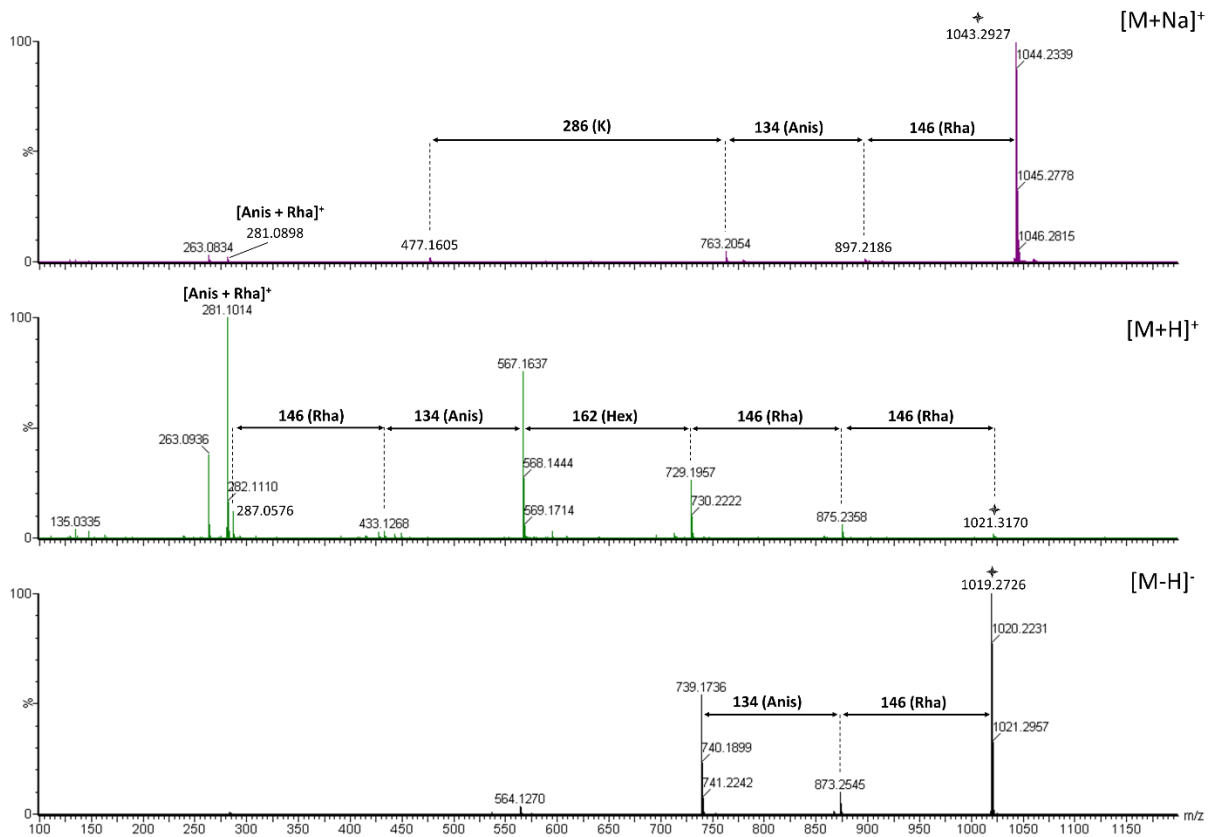

Figure S32. LC/ESI/MS/MS data of compound 12

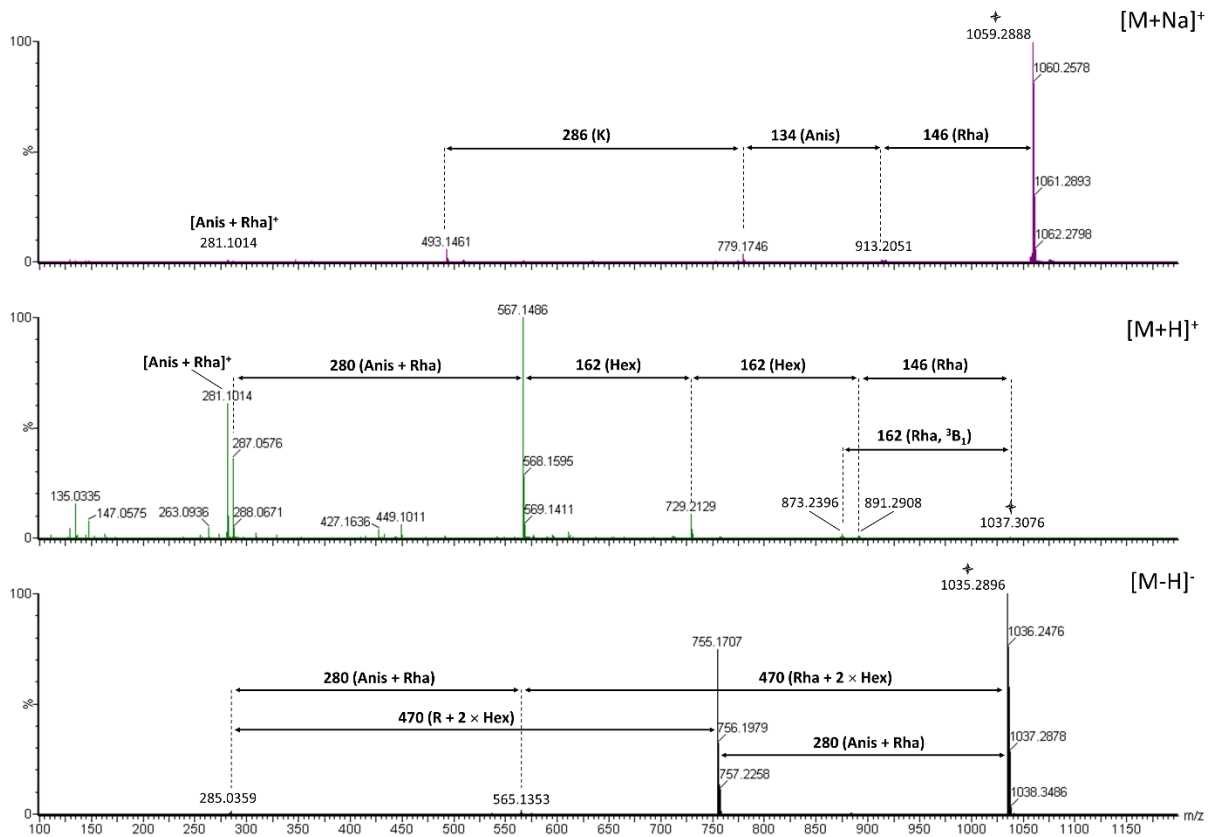

Figure S33. LC/ESI/MS/MS data of compound 13

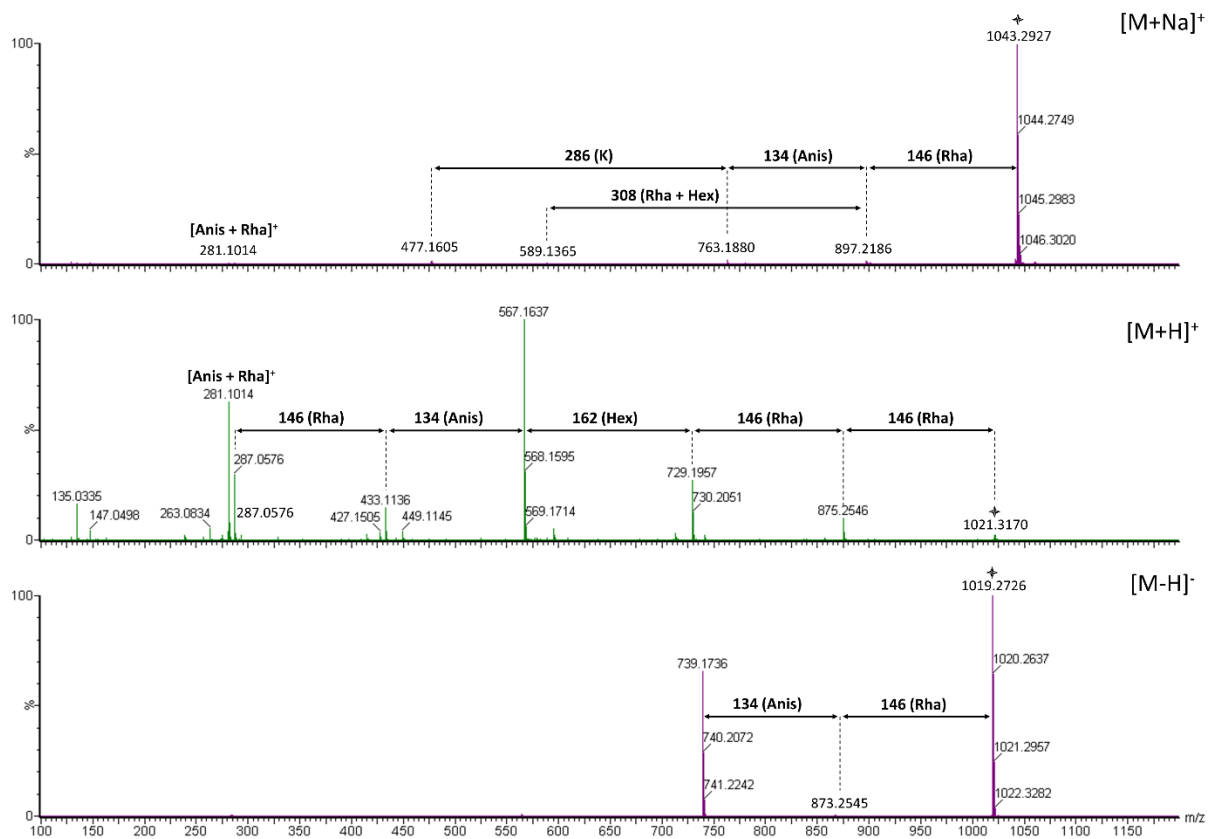

Figure S34. LC/ESI/MS/MS data of compound 14

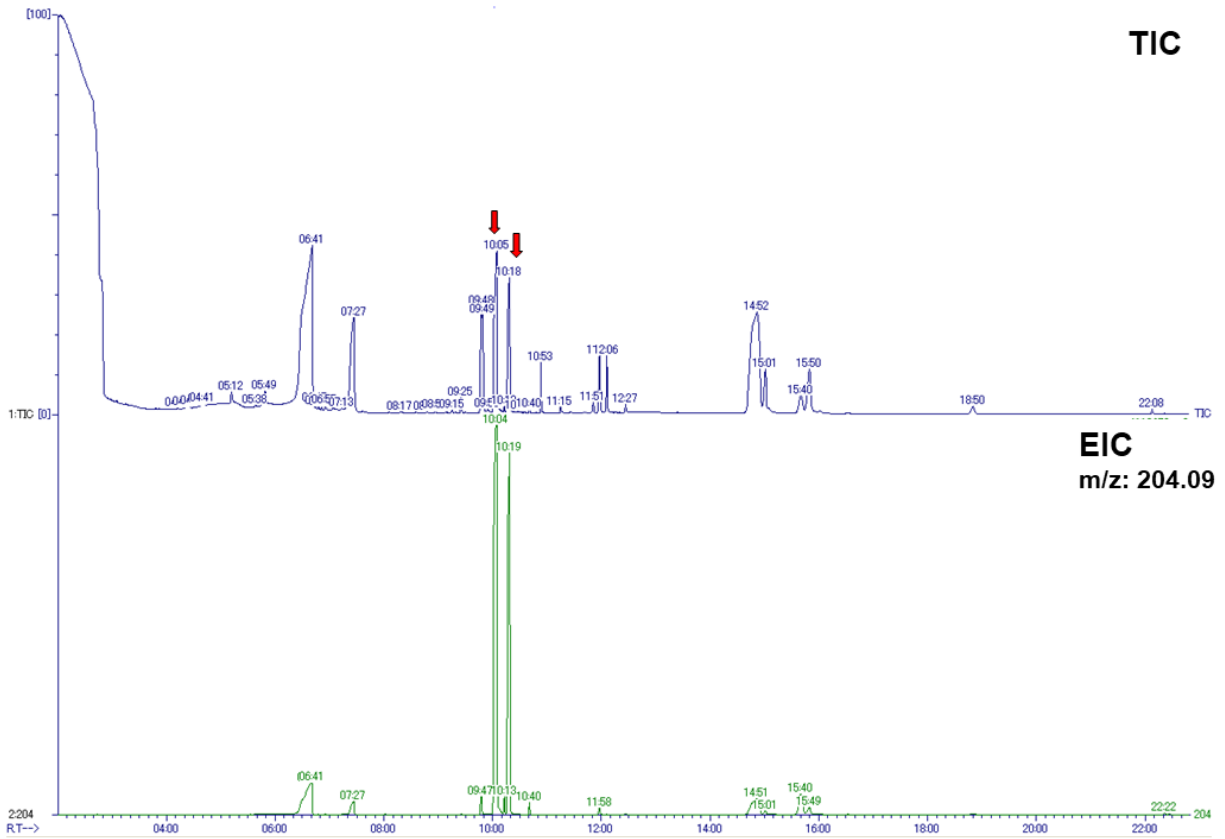

Figure S35. GC-MS total ion chromatogram and extracted ion chromatogram of trimethylsilyl (TMS) derivatives of galactose

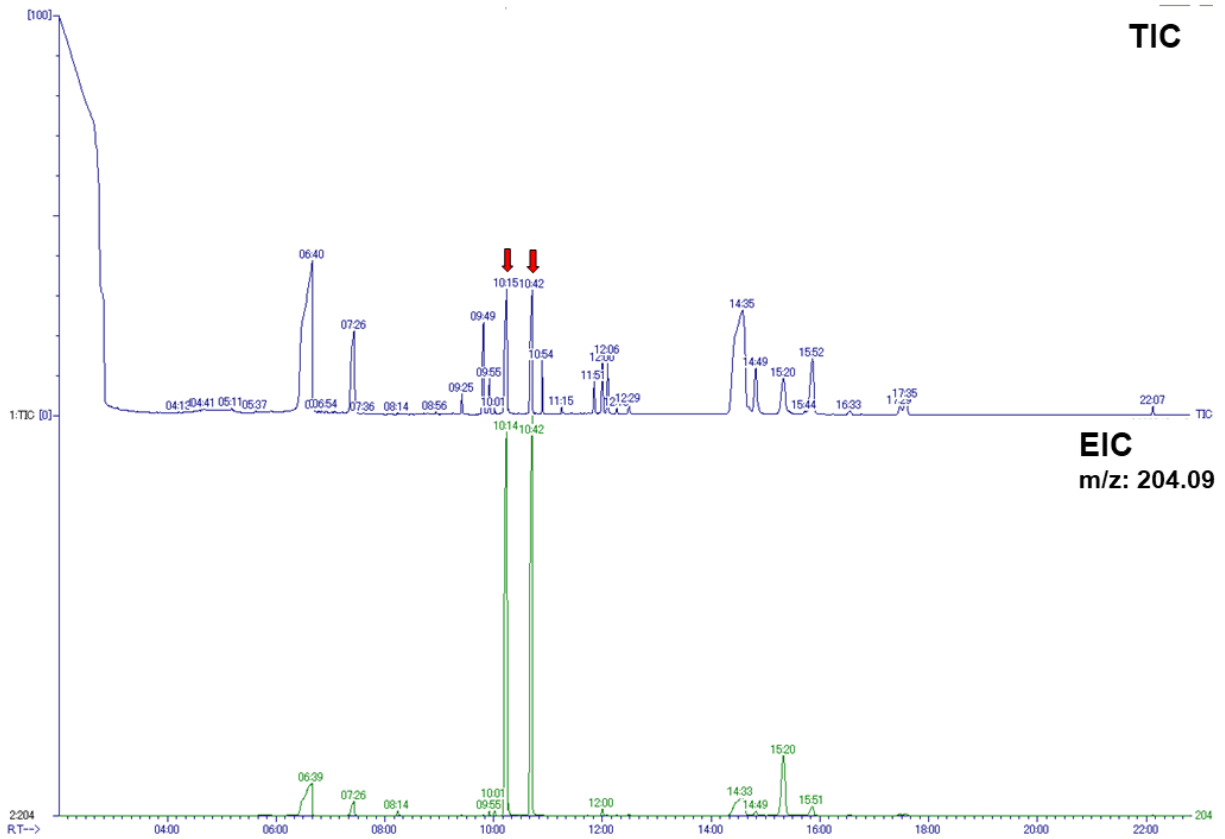

**Figure S36.** GC-MS total ion chromatogram and extracted ion chromatogram of trimethylsilyl (TMS) derivatives of glucose

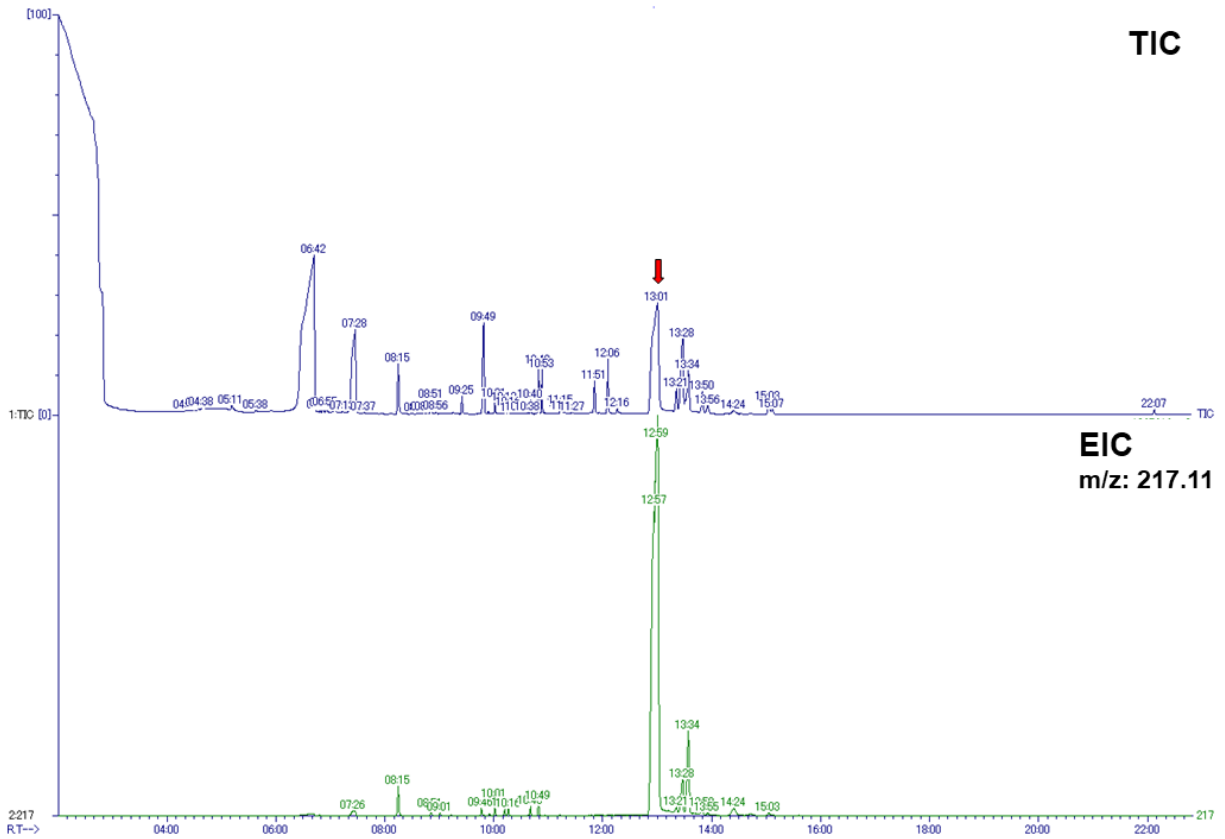

**Figure S37.** GC-MS total ion chromatogram and extracted ion chromatogram of trimethylsilyl (TMS) derivatives of rhamnose



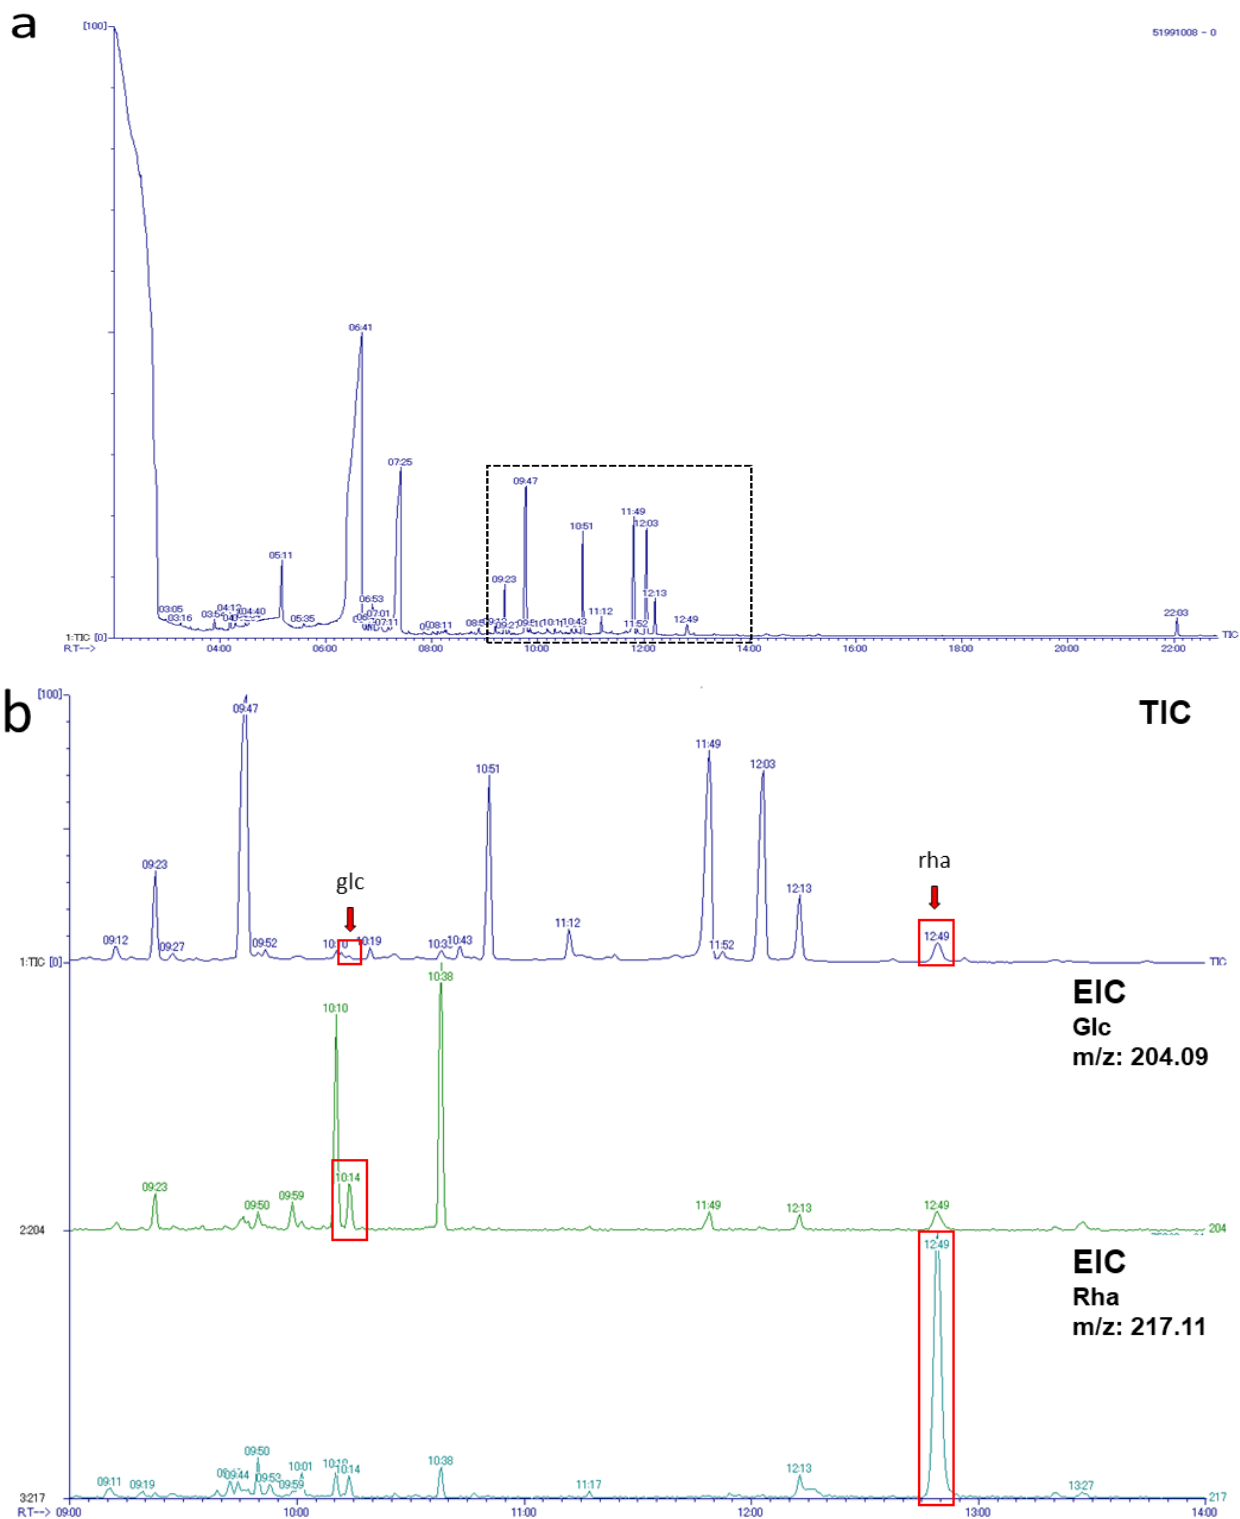

**Figure S38.** GC-MS total ion chromatogram and extracted ion chromatogram trimethylsilyl (TMS) derivatives of compound 1. (a) full retention time chromatogram, (b) expand on retention time chromatogram.

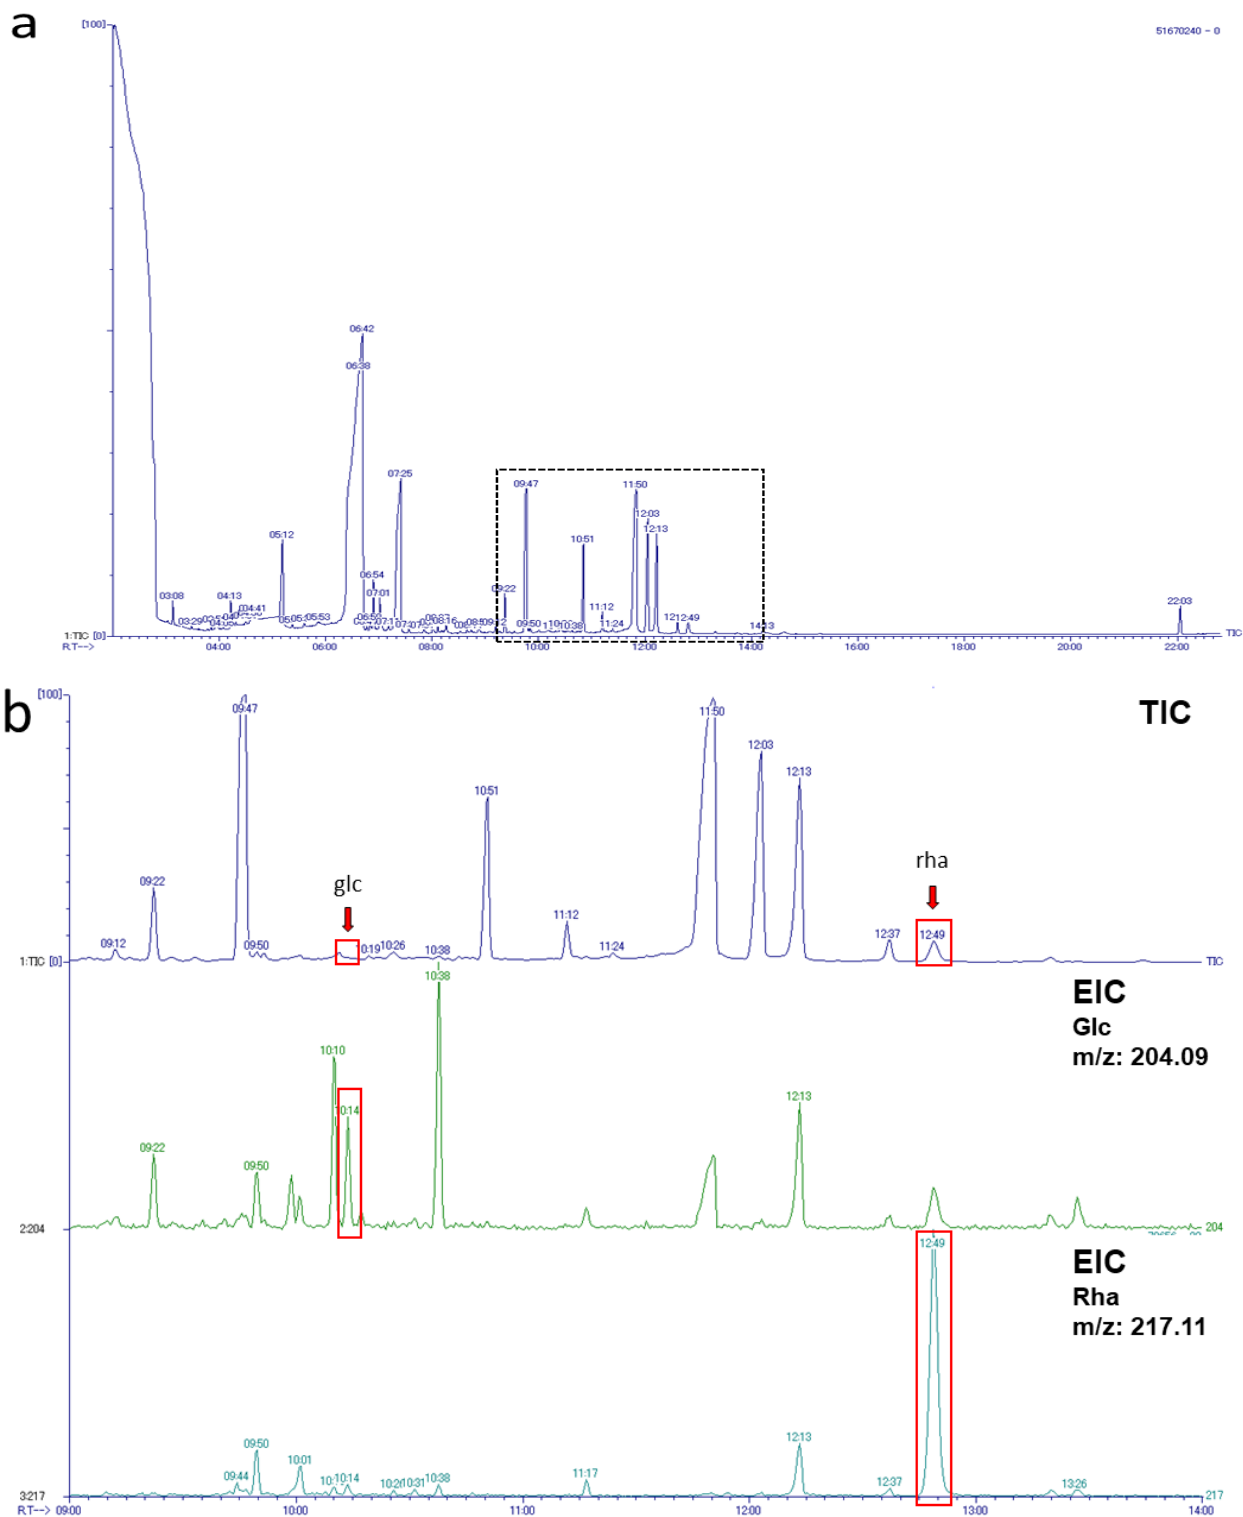

**Figure S39.** GC-MS total ion chromatogram and extracted ion chromatogram trimethylsilyl (TMS) derivatives of compound 2. (a) full retention time chromatogram, (b) expand on retention time chromatogram.

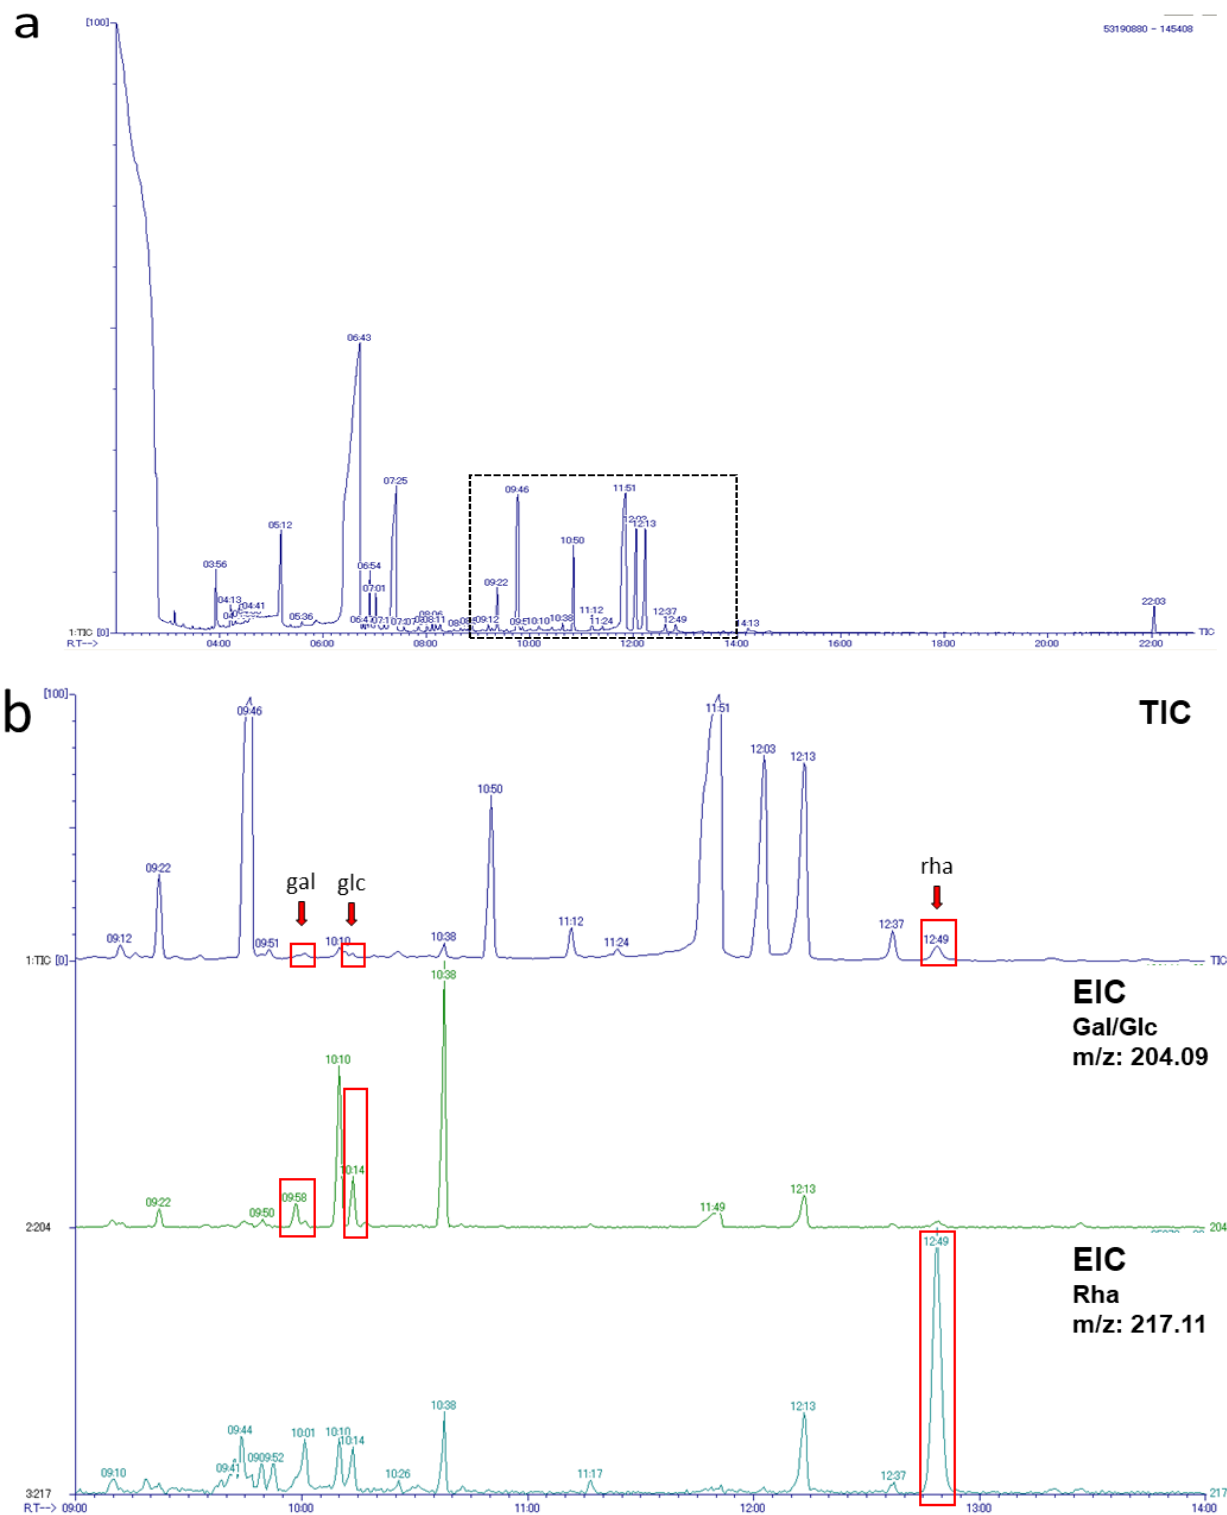

**Figure S40.** GC-MS total ion chromatogram and extracted ion chromatogram trimethylsilyl (TMS) derivatives of compound 3. (a) full retention time chromatogram, (b) expand on retention time chromatogram.

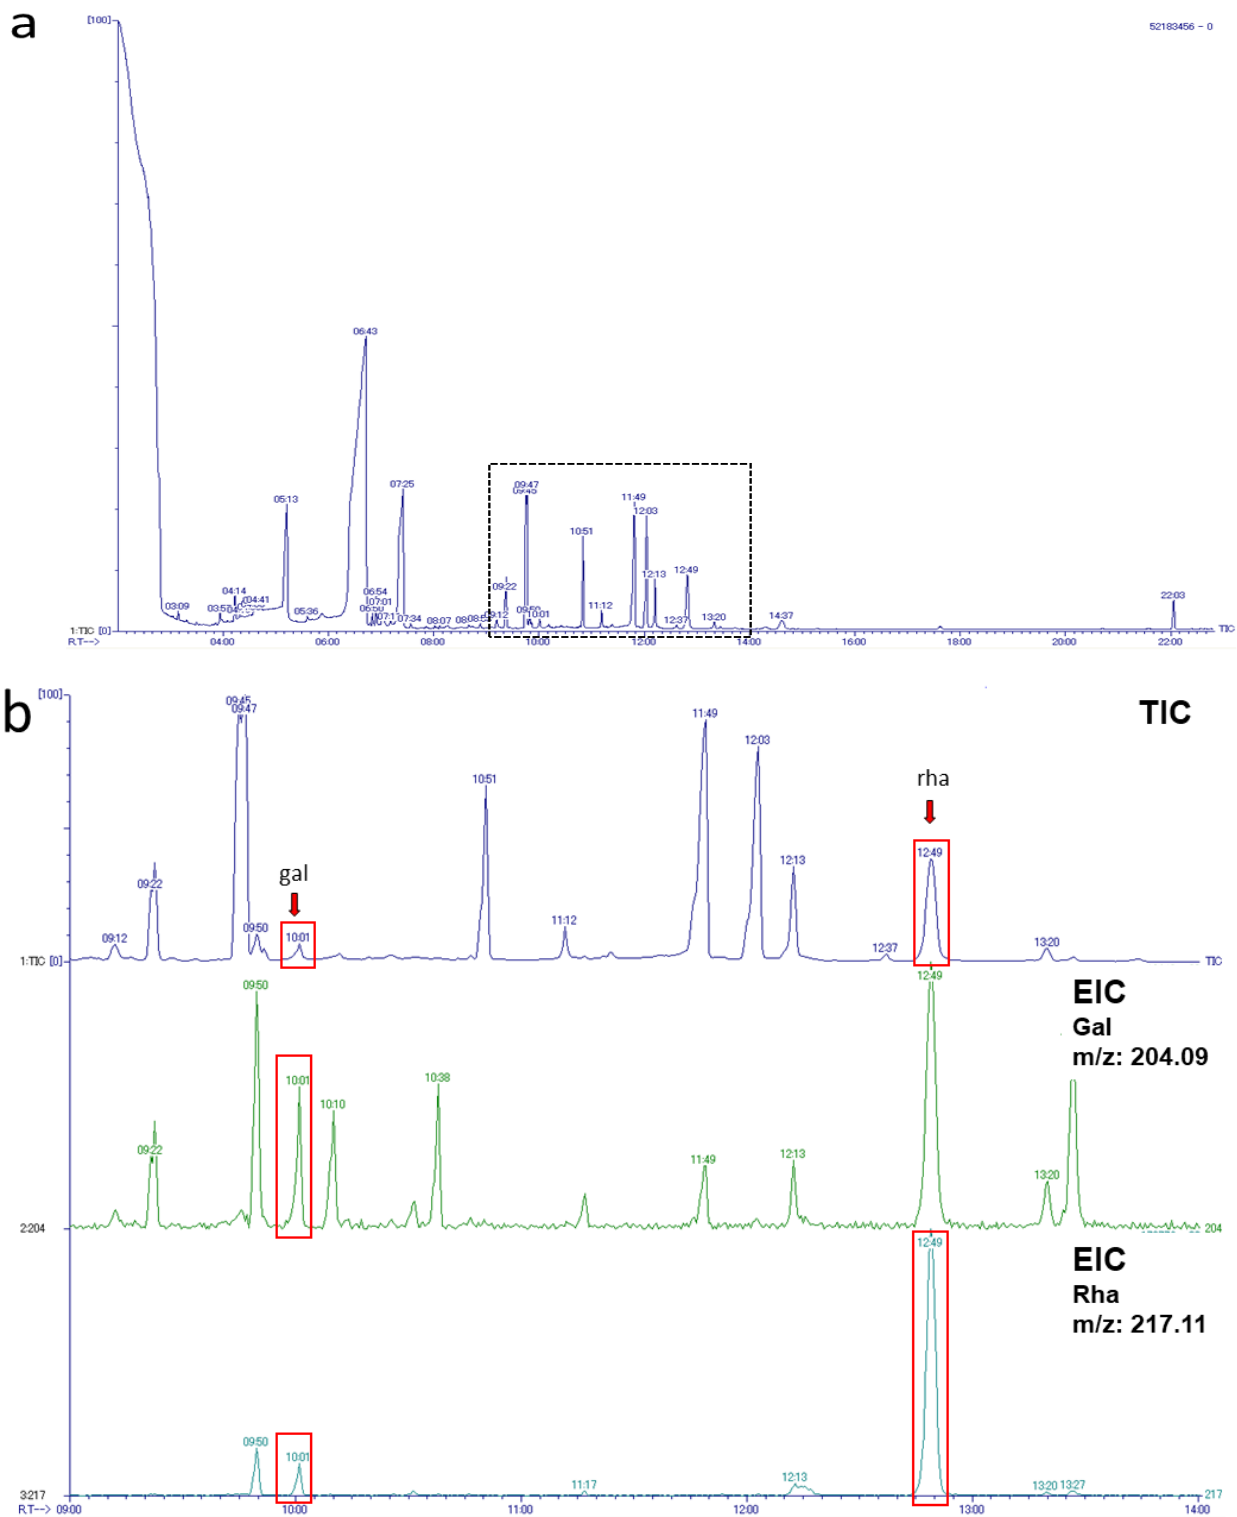

**Figure S41.** GC-MS total ion chromatogram and extracted ion chromatogram trimethylsilyl (TMS) derivatives of compound **4**. (a) full retention time chromatogram, (b) expand on retention time chromatogram.

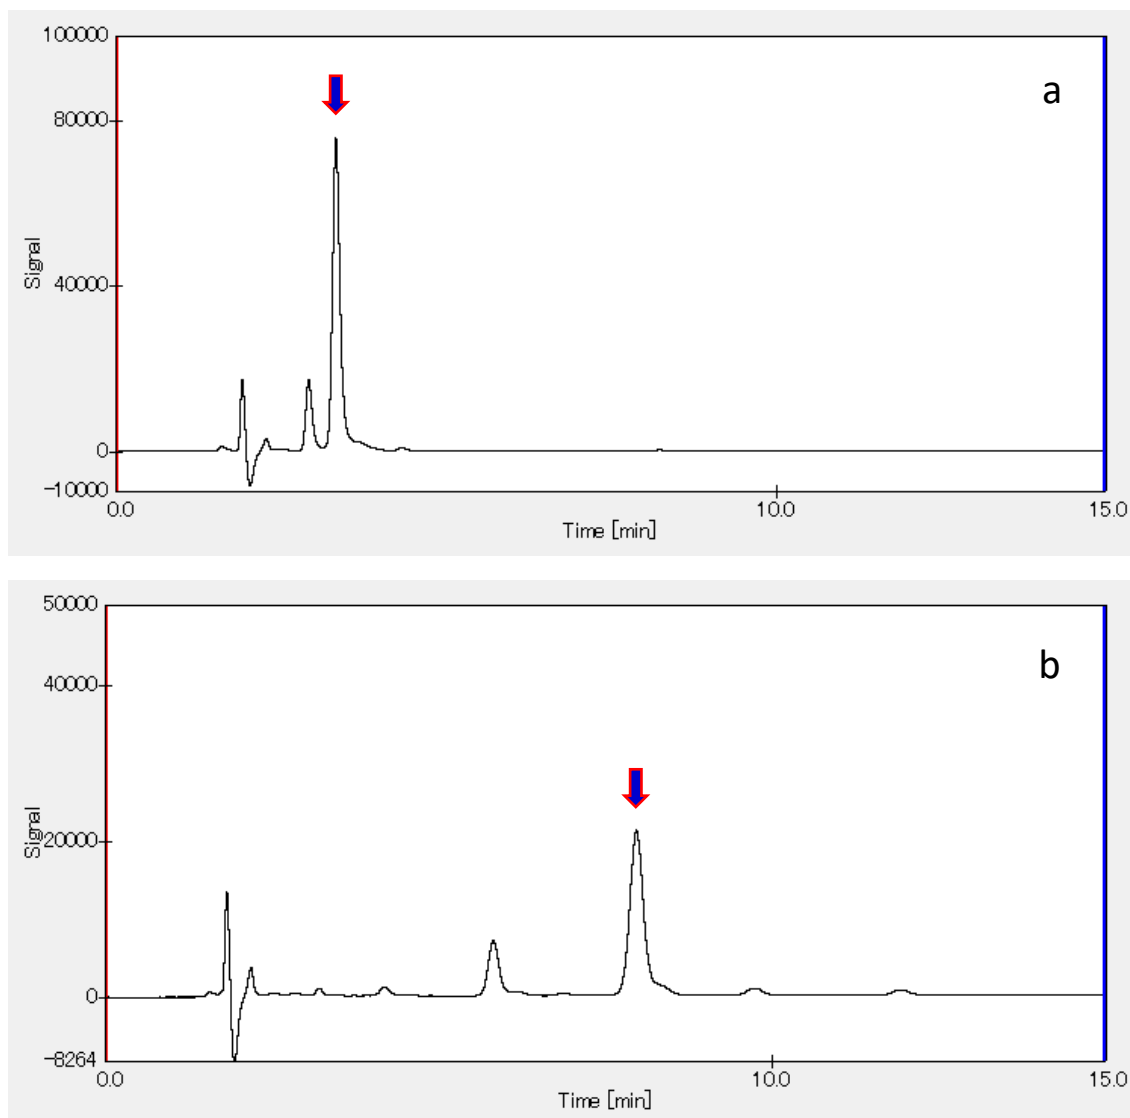

**Figure S42.** Chromatogram of compounds 1 (a) and 2 (b)

**Note:**

HPLC was performed using a Jasco PU2089 intelligent pump equipped with a Jasco UV-2075 detector (Tokyo, Japan) and a Shimadzu CTO-10ACVP column oven (Kyoto, Japan). Cosmosil 5C18-MS-II column (4.6 mm I.D. × 150 mm, particle size of 5  $\mu\text{m}$ ) was used and the temperature was 35  $^{\circ}\text{C}$ . Elution was performed with 15% MeCN and 0.5% HCOOH in water. The flow rate of the eluent was 1.0 mL/min.

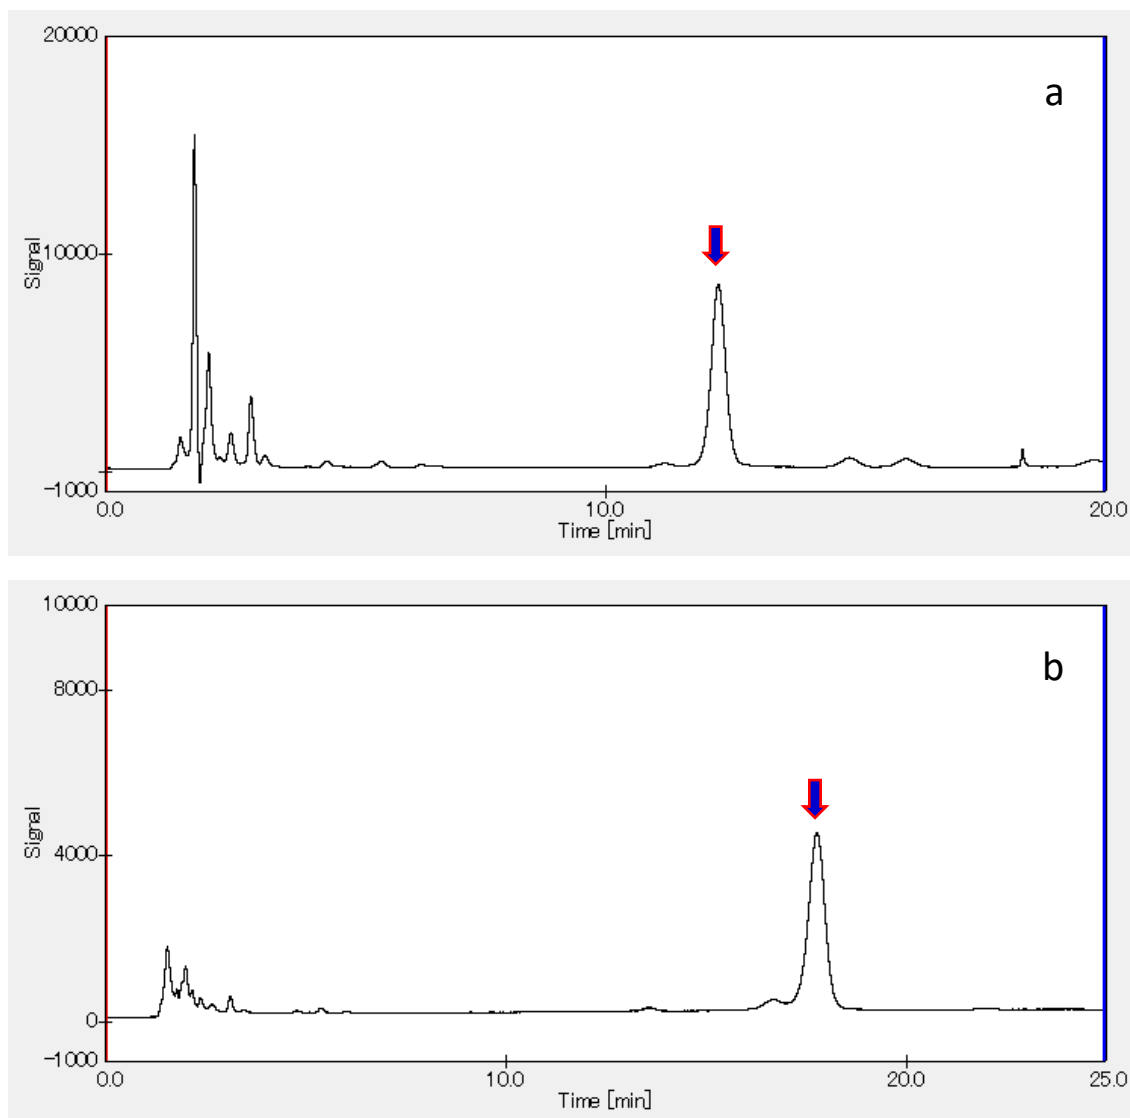

**Figure S43.** Chromatogram of compounds **3** (a) and **4** (b)

**Note:**

HPLC was performed using a Jasco PU2089 intelligent pump equipped with a Jasco UV-2075 detector (Tokyo, Japan) and a Shimadzu CTO-10ACVP column oven (Kyoto, Japan). Cosmosil 5C18-MS-II column (4.6 mm I.D. × 150 mm, particle size of 5  $\mu\text{m}$ ) was used and the temperature was 35  $^{\circ}\text{C}$ . Elution was performed with 20 % MeCN and 0.5% HCOOH in water. The flow rate of the eluent was 1.0 mL/min.
